# Supplementary material
Source: HighWire-hosted journal article supplement (https://bmjopen.bmj.com/content/11/7/e050473)
Supplement: inline-supplementary-material-1 [file inline-supplementary-material-1.xlsx]

## Sheet: Sheet1
Test Name	Quarantine Days	Test Days	Onset of Infection	PQTR	Observed Sensitivity
Ag65	5	0 1	mixed	0.027907	0.520294
Ag65	5	0 1	simulteneous	0.16425	0.0842699
Ag65	5	0 2	mixed	0.020458	0.557944
Ag65	5	0 2	simulteneous	0.134929	0.263327
Ag65	5	0 3	mixed	0.01381	0.562217
Ag65	5	0 3	simulteneous	0.090087	0.322742
Ag65	5	0 4	mixed	0.010501	0.551919
Ag65	5	0 4	simulteneous	0.064437	0.313972
Ag65	5	0 5	mixed	0.032046	0.538898
Ag65	5	0 5	simulteneous	0.162979	0.256802
Ag65	5	1 2	mixed	0.019251	0.627415
Ag65	5	1 2	simulteneous	0.136769	0.307844
Ag65	5	1 3	mixed	0.012643	0.64246
Ag65	5	1 3	simulteneous	0.091476	0.383444
Ag65	5	1 4	mixed	0.009555	0.643428
Ag65	5	1 4	simulteneous	0.06277	0.393457
Ag65	5	1 5	mixed	0.028153	0.639789
Ag65	5	1 5	simulteneous	0.159691	0.358297
Ag65	5	2 3	mixed	0.010524	0.687631
Ag65	5	2 3	simulteneous	0.082598	0.537703
Ag65	5	2 4	mixed	0.007784	0.692501
Ag65	5	2 4	simulteneous	0.057804	0.565641
Ag65	5	2 5	mixed	0.020635	0.694464
Ag65	5	2 5	simulteneous	0.135269	0.569981
Ag65	5	3 4	mixed	0.005884	0.701115
Ag65	5	3 4	simulteneous	0.04424	0.657853
Ag65	5	3 5	mixed	0.014775	0.705112
Ag65	5	3 5	simulteneous	0.09179	0.665523
Ag65	5	4 5	mixed	0.011361	0.693055
Ag65	5	4 5	simulteneous	0.063861	0.69936
Ag65	7	0	mixed	0.009489	0.51759
Ag65	7	0	simulteneous	0.055174	0
Ag65	7	0 1 2	mixed	0.0070792	0.528107
Ag65	7	0 1 2	simulteneous	0.0534526	0.200001
Ag65	7	0 1 3	mixed	0.0055804	0.536857
Ag65	7	0 1 3	simulteneous	0.0426764	0.247061
Ag65	7	0 1 4	mixed	0.0041734	0.536225
Ag65	7	0 1 4	simulteneous	0.0321358	0.2462
Ag65	7	0 1 5	mixed	0.0033058	0.531151
Ag65	7	0 1 5	simulteneous	0.024025	0.215605
Ag65	7	0 1 6	mixed	0.0028642	0.526558
Ag65	7	0 1 6	simulteneous	0.0192294	0.174863
Ag65	7	0 1 7	mixed	0.0087364	0.524189
Ag65	7	0 1 7	simulteneous	0.0555732	0.142147
Ag65	7	0 2 3	mixed	0.0049578	0.563774
Ag65	7	0 2 3	simulteneous	0.0416184	0.318731
Ag65	7	0 2 4	mixed	0.0038046	0.565322
Ag65	7	0 2 4	simulteneous	0.0312098	0.331688
Ag65	7	0 2 5	mixed	0.0029512	0.563843
Ag65	7	0 2 5	simulteneous	0.0233972	0.326985
Ag65	7	0 2 6	mixed	0.0025012	0.562286
Ag65	7	0 2 6	simulteneous	0.018595	0.313755
Ag65	7	0 2 7	mixed	0.0074882	0.561498
Ag65	7	0 2 7	simulteneous	0.053425	0.297875
Ag65	7	0 3 4	mixed	0.003133	0.56595
Ag65	7	0 3 4	simulteneous	0.0263826	0.359373
Ag65	7	0 3 5	mixed	0.0024112	0.564914
Ag65	7	0 3 5	simulteneous	0.0201026	0.356769
Ag65	7	0 3 6	mixed	0.0020606	0.564242
Ag65	7	0 3 6	simulteneous	0.0159844	0.350774
Ag65	7	0 3 7	mixed	0.0058246	0.563877
Ag65	7	0 3 7	simulteneous	0.0431702	0.343573
Ag65	7	0 4 5	mixed	0.0020276	0.553887
Ag65	7	0 4 5	simulteneous	0.0160446	0.343486
Ag65	7	0 4 6	mixed	0.0016686	0.553064
Ag65	7	0 4 6	simulteneous	0.013105	0.335316
Ag65	7	0 4 7	mixed	0.0044508	0.552357
Ag65	7	0 4 7	simulteneous	0.0317394	0.330454
Ag65	7	0 5 6	mixed	0.0013632	0.539348
Ag65	7	0 5 6	simulteneous	0.0104366	0.280806
Ag65	7	0 5 7	mixed	0.0035082	0.538129
Ag65	7	0 5 7	simulteneous	0.0242324	0.27273
Ag65	7	0 6 7	mixed	0.0030056	0.528957
Ag65	7	0 6 7	simulteneous	0.0193002	0.202808
Ag65	7	1	mixed	0.009135	0.632426
Ag65	7	1	simulteneous	0.056272	0.168376
Ag65	7	1 2 3	mixed	0.0048286	0.625711
Ag65	7	1 2 3	simulteneous	0.0417328	0.35469
Ag65	7	1 2 4	mixed	0.0036846	0.629645
Ag65	7	1 2 4	simulteneous	0.03114	0.371585
Ag65	7	1 2 5	mixed	0.00289	0.630178
Ag65	7	1 2 5	simulteneous	0.0236794	0.369154
Ag65	7	1 2 6	mixed	0.0024162	0.629954
Ag65	7	1 2 6	simulteneous	0.018847	0.357537
Ag65	7	1 2 7	mixed	0.0071082	0.629315
Ag65	7	1 2 7	simulteneous	0.053119	0.34399
Ag65	7	1 3 4	mixed	0.0030022	0.640815
Ag65	7	1 3 4	simulteneous	0.026812	0.411529
Ag65	7	1 3 5	mixed	0.0023866	0.642151
Ag65	7	1 3 5	simulteneous	0.0200406	0.413059
Ag65	7	1 3 6	mixed	0.0020122	0.641788
Ag65	7	1 3 6	simulteneous	0.0160996	0.408964
Ag65	7	1 3 7	mixed	0.0056686	0.642074
Ag65	7	1 3 7	simulteneous	0.0430654	0.402881
Ag65	7	1 4 5	mixed	0.0019374	0.641821
Ag65	7	1 4 5	simulteneous	0.0163386	0.412581
Ag65	7	1 4 6	mixed	0.0016366	0.642189
Ag65	7	1 4 6	simulteneous	0.0129874	0.408201
Ag65	7	1 4 7	mixed	0.0042936	0.641856
Ag65	7	1 4 7	simulteneous	0.031984	0.403922
Ag65	7	1 5 6	mixed	0.0013474	0.638083
Ag65	7	1 5 6	simulteneous	0.0105698	0.373498
Ag65	7	1 5 7	mixed	0.0033438	0.638842
Ag65	7	1 5 7	simulteneous	0.0240362	0.368117
Ag65	7	1 6 7	mixed	0.0028746	0.635491
Ag65	7	1 6 7	simulteneous	0.0192486	0.318937
Ag65	7	2	mixed	0.007667	0.697614
Ag65	7	2	simulteneous	0.052939	0.53126
Ag65	7	2 3 4	mixed	0.0028036	0.682308
Ag65	7	2 3 4	simulteneous	0.0262278	0.541005
Ag65	7	2 3 5	mixed	0.0022074	0.684734
Ag65	7	2 3 5	simulteneous	0.0197404	0.548962
Ag65	7	2 3 6	mixed	0.001836	0.685367
Ag65	7	2 3 6	simulteneous	0.0157354	0.550451
Ag65	7	2 3 7	mixed	0.0050174	0.686087
Ag65	7	2 3 7	simulteneous	0.0416028	0.549373
Ag65	7	2 4 5	mixed	0.0018116	0.689661
Ag65	7	2 4 5	simulteneous	0.0160802	0.569927
Ag65	7	2 4 6	mixed	0.0014832	0.690541
Ag65	7	2 4 6	simulteneous	0.012817	0.571501
Ag65	7	2 4 7	mixed	0.0038514	0.691188
Ag65	7	2 4 7	simulteneous	0.0312128	0.571061
Ag65	7	2 5 6	mixed	0.001258	0.692308
Ag65	7	2 5 6	simulteneous	0.0103074	0.572717
Ag65	7	2 5 7	mixed	0.0029834	0.693128
Ag65	7	2 5 7	simulteneous	0.0234846	0.57191
Ag65	7	2 6 7	mixed	0.002543	0.694076
Ag65	7	2 6 7	simulteneous	0.0185434	0.564457
Ag65	7	3	mixed	0.005997	0.71311
Ag65	7	3	simulteneous	0.043167	0.668777
Ag65	7	3 4 5	mixed	0.0015344	0.69662
Ag65	7	3 4 5	simulteneous	0.0145718	0.650438
Ag65	7	3 4 6	mixed	0.0012964	0.697765
Ag65	7	3 4 6	simulteneous	0.0114822	0.655329
Ag65	7	3 4 7	mixed	0.0032158	0.699228
Ag65	7	3 4 7	simulteneous	0.0269416	0.655708
Ag65	7	3 5 6	mixed	0.001093	0.70073
Ag65	7	3 5 6	simulteneous	0.0093364	0.661676
Ag65	7	3 5 7	mixed	0.0025226	0.702675
Ag65	7	3 5 7	simulteneous	0.0204194	0.662942
Ag65	7	3 6 7	mixed	0.002069	0.704974
Ag65	7	3 6 7	simulteneous	0.0161462	0.665116
Ag65	7	4	mixed	0.004445	0.704537
Ag65	7	4	simulteneous	0.032062	0.713909
Ag65	7	4 5 6	mixed	0.0009356	0.685706
Ag65	7	4 5 6	simulteneous	0.0080212	0.692016
Ag65	7	4 5 7	mixed	0.0020406	0.688274
Ag65	7	4 5 7	simulteneous	0.0163756	0.693727
Ag65	7	4 6 7	mixed	0.0017344	0.691786
Ag65	7	4 6 7	simulteneous	0.0131038	0.696351
Ag65	7	5	mixed	0.003616	0.684396
Ag65	7	5	simulteneous	0.023757	0.706901
Ag65	7	5 6 7	mixed	0.0014426	0.663123
Ag65	7	5 6 7	simulteneous	0.0105326	0.684616
Ag65	7	6	mixed	0.003027	0.658687
Ag65	7	6	simulteneous	0.019428	0.682069
Ag65	7	7	mixed	0.009783	0.639964
Ag65	7	7	simulteneous	0.055323	0.665355
Ag65	8	0 1	mixed	0.0047158	0.521134
Ag65	8	0 1	simulteneous	0.0319668	0.0850689
Ag65	8	0 1 2	mixed	0.0041148	0.528469
Ag65	8	0 1 2	simulteneous	0.0316768	0.199624
Ag65	8	0 1 2 3	mixed	0.003052	0.530094
Ag65	8	0 1 2 3	simulteneous	0.026352	0.246057
Ag65	8	0 1 2 4	mixed	0.002439	0.532694
Ag65	8	0 1 2 4	simulteneous	0.020768	0.257198
Ag65	8	0 1 2 5	mixed	0.001914	0.532892
Ag65	8	0 1 2 5	simulteneous	0.016563	0.252972
Ag65	8	0 1 2 6	mixed	0.001603	0.529925
Ag65	8	0 1 2 6	simulteneous	0.01278	0.24167
Ag65	8	0 1 2 7	mixed	0.001415	0.531033
Ag65	8	0 1 2 7	simulteneous	0.01066	0.229162
Ag65	8	0 1 2 8	mixed	0.004019	0.529987
Ag65	8	0 1 2 8	simulteneous	0.031766	0.218755
Ag65	8	0 1 3	mixed	0.0034608	0.536858
Ag65	8	0 1 3	simulteneous	0.0271746	0.246478
Ag65	8	0 1 3 4	mixed	0.002118	0.540056
Ag65	8	0 1 3 4	simulteneous	0.018805	0.276965
Ag65	8	0 1 3 5	mixed	0.001631	0.538514
Ag65	8	0 1 3 5	simulteneous	0.014676	0.276881
Ag65	8	0 1 3 6	mixed	0.001385	0.538682
Ag65	8	0 1 3 6	simulteneous	0.011524	0.271122
Ag65	8	0 1 3 7	mixed	0.001241	0.538081
Ag65	8	0 1 3 7	simulteneous	0.010116	0.264831
Ag65	8	0 1 3 8	mixed	0.003402	0.537199
Ag65	8	0 1 3 8	simulteneous	0.027108	0.260379
Ag65	8	0 1 4	mixed	0.0027026	0.536024
Ag65	8	0 1 4	simulteneous	0.0215238	0.246352
Ag65	8	0 1 4 5	mixed	0.001403	0.537972
Ag65	8	0 1 4 5	simulteneous	0.012284	0.269072
Ag65	8	0 1 4 6	mixed	0.001108	0.536445
Ag65	8	0 1 4 6	simulteneous	0.009657	0.263992
Ag65	8	0 1 4 7	mixed	0.000999	0.536172
Ag65	8	0 1 4 7	simulteneous	0.008138	0.260447
Ag65	8	0 1 4 8	mixed	0.002767	0.536309
Ag65	8	0 1 4 8	simulteneous	0.021488	0.256192
Ag65	8	0 1 5	mixed	0.002129	0.53153
Ag65	8	0 1 5	simulteneous	0.0165838	0.215661
Ag65	8	0 1 5 6	mixed	0.000934	0.532088
Ag65	8	0 1 5 6	simulteneous	0.008163	0.231477
Ag65	8	0 1 5 7	mixed	0.000783	0.53215
Ag65	8	0 1 5 7	simulteneous	0.00672	0.227197
Ag65	8	0 1 5 8	mixed	0.002163	0.531118
Ag65	8	0 1 5 8	simulteneous	0.016279	0.223554
Ag65	8	0 1 6	mixed	0.0017866	0.527034
Ag65	8	0 1 6	simulteneous	0.0129082	0.174973
Ag65	8	0 1 6 7	mixed	0.000724	0.528738
Ag65	8	0 1 6 7	simulteneous	0.005541	0.187308
Ag65	8	0 1 6 8	mixed	0.001722	0.52757
Ag65	8	0 1 6 8	simulteneous	0.012877	0.183107
Ag65	8	0 1 7	mixed	0.0015956	0.524288
Ag65	8	0 1 7	simulteneous	0.0110094	0.142228
Ag65	8	0 1 7 8	mixed	0.001548	0.525652
Ag65	8	0 1 7 8	simulteneous	0.010608	0.150151
Ag65	8	0 1 8	mixed	0.0047708	0.522011
Ag65	8	0 1 8	simulteneous	0.0316574	0.119868
Ag65	8	0 2	mixed	0.0043406	0.558958
Ag65	8	0 2	simulteneous	0.031364	0.263159
Ag65	8	0 2 3	mixed	0.0031616	0.564079
Ag65	8	0 2 3	simulteneous	0.0266712	0.31869
Ag65	8	0 2 3 4	mixed	0.001984	0.564752
Ag65	8	0 2 3 4	simulteneous	0.01875	0.335417
Ag65	8	0 2 3 5	mixed	0.0016	0.564789
Ag65	8	0 2 3 5	simulteneous	0.014629	0.339412
Ag65	8	0 2 3 6	mixed	0.001324	0.565235
Ag65	8	0 2 3 6	simulteneous	0.011524	0.339026
Ag65	8	0 2 3 7	mixed	0.001141	0.564337
Ag65	8	0 2 3 7	simulteneous	0.009523	0.335046
Ag65	8	0 2 3 8	mixed	0.003157	0.564474
Ag65	8	0 2 3 8	simulteneous	0.027343	0.329395
Ag65	8	0 2 4	mixed	0.0025446	0.565104
Ag65	8	0 2 4	simulteneous	0.0212576	0.33178
Ag65	8	0 2 4 5	mixed	0.001238	0.565533
Ag65	8	0 2 4 5	simulteneous	0.012349	0.344578
Ag65	8	0 2 4 6	mixed	0.001047	0.564783
Ag65	8	0 2 4 6	simulteneous	0.009869	0.343722
Ag65	8	0 2 4 7	mixed	0.000977	0.565706
Ag65	8	0 2 4 7	simulteneous	0.008062	0.342326
Ag65	8	0 2 4 8	mixed	0.002527	0.565301
Ag65	8	0 2 4 8	simulteneous	0.021541	0.339581
Ag65	8	0 2 5	mixed	0.0019608	0.563697
Ag65	8	0 2 5	simulteneous	0.01637	0.327424
Ag65	8	0 2 5 6	mixed	0.000921	0.564766
Ag65	8	0 2 5 6	simulteneous	0.007948	0.33763
Ag65	8	0 2 5 7	mixed	0.000828	0.563679
Ag65	8	0 2 5 7	simulteneous	0.006772	0.334565
Ag65	8	0 2 5 8	mixed	0.001958	0.564686
Ag65	8	0 2 5 8	simulteneous	0.016608	0.332368
Ag65	8	0 2 6	mixed	0.0016292	0.56262
Ag65	8	0 2 6	simulteneous	0.0128116	0.313421
Ag65	8	0 2 6 7	mixed	0.00065	0.562602
Ag65	8	0 2 6 7	simulteneous	0.005433	0.321083
Ag65	8	0 2 6 8	mixed	0.001567	0.563583
Ag65	8	0 2 6 8	simulteneous	0.012859	0.318502
Ag65	8	0 2 7	mixed	0.0014392	0.560728
Ag65	8	0 2 7	simulteneous	0.0106194	0.298551
Ag65	8	0 2 7 8	mixed	0.00144	0.561647
Ag65	8	0 2 7 8	simulteneous	0.010885	0.302686
Ag65	8	0 2 8	mixed	0.0042716	0.560405
Ag65	8	0 2 8	simulteneous	0.0315692	0.285504
Ag65	8	0 3	mixed	0.0035976	0.56215
Ag65	8	0 3	simulteneous	0.0269084	0.321775
Ag65	8	0 3 4	mixed	0.0021258	0.566248
Ag65	8	0 3 4	simulteneous	0.018943	0.358699
Ag65	8	0 3 4 5	mixed	0.001166	0.565955
Ag65	8	0 3 4 5	simulteneous	0.011395	0.366411
Ag65	8	0 3 4 6	mixed	0.000913	0.56559
Ag65	8	0 3 4 6	simulteneous	0.008884	0.367789
Ag65	8	0 3 4 7	mixed	0.000809	0.566183
Ag65	8	0 3 4 7	simulteneous	0.007386	0.367397
Ag65	8	0 3 4 8	mixed	0.002274	0.564468
Ag65	8	0 3 4 8	simulteneous	0.019005	0.365414
Ag65	8	0 3 5	mixed	0.0017546	0.564704
Ag65	8	0 3 5	simulteneous	0.0147592	0.356543
Ag65	8	0 3 5 6	mixed	0.00081	0.566103
Ag65	8	0 3 5 6	simulteneous	0.007504	0.363385
Ag65	8	0 3 5 7	mixed	0.000716	0.565549
Ag65	8	0 3 5 7	simulteneous	0.006138	0.362665
Ag65	8	0 3 5 8	mixed	0.001689	0.565161
Ag65	8	0 3 5 8	simulteneous	0.014657	0.361097
Ag65	8	0 3 6	mixed	0.0014178	0.564398
Ag65	8	0 3 6	simulteneous	0.011617	0.350531
Ag65	8	0 3 6 7	mixed	0.000575	0.565024
Ag65	8	0 3 6 7	simulteneous	0.005033	0.35581
Ag65	8	0 3 6 8	mixed	0.001463	0.562764
Ag65	8	0 3 6 8	simulteneous	0.011652	0.354467
Ag65	8	0 3 7	mixed	0.0012608	0.563004
Ag65	8	0 3 7	simulteneous	0.0096612	0.343879
Ag65	8	0 3 7 8	mixed	0.001213	0.564176
Ag65	8	0 3 7 8	simulteneous	0.009814	0.347234
Ag65	8	0 3 8	mixed	0.0035792	0.562296
Ag65	8	0 3 8	simulteneous	0.0272676	0.336853
Ag65	8	0 4	mixed	0.0028624	0.551336
Ag65	8	0 4	simulteneous	0.021348	0.314552
Ag65	8	0 4 5	mixed	0.0014144	0.55355
Ag65	8	0 4 5	simulteneous	0.0123096	0.342989
Ag65	8	0 4 5 6	mixed	0.000717	0.553154
Ag65	8	0 4 5 6	simulteneous	0.006376	0.349318
Ag65	8	0 4 5 7	mixed	0.000609	0.553851
Ag65	8	0 4 5 7	simulteneous	0.005262	0.348995
Ag65	8	0 4 5 8	mixed	0.001467	0.553537
Ag65	8	0 4 5 8	simulteneous	0.01218	0.347275
Ag65	8	0 4 6	mixed	0.0011846	0.552939
Ag65	8	0 4 6	simulteneous	0.0097174	0.335661
Ag65	8	0 4 6 7	mixed	0.000518	0.552908
Ag65	8	0 4 6 7	simulteneous	0.004652	0.340194
Ag65	8	0 4 6 8	mixed	0.001203	0.551846
Ag65	8	0 4 6 8	simulteneous	0.009786	0.338667
Ag65	8	0 4 7	mixed	0.001019	0.552066
Ag65	8	0 4 7	simulteneous	0.008059	0.330738
Ag65	8	0 4 7 8	mixed	0.001034	0.552785
Ag65	8	0 4 7 8	simulteneous	0.008329	0.332127
Ag65	8	0 4 8	mixed	0.0028502	0.551784
Ag65	8	0 4 8	simulteneous	0.0213378	0.326295
Ag65	8	0 5	mixed	0.0022522	0.537762
Ag65	8	0 5	simulteneous	0.0165016	0.256442
Ag65	8	0 5 6	mixed	0.000952	0.539173
Ag65	8	0 5 6	simulteneous	0.0080224	0.280978
Ag65	8	0 5 6 7	mixed	0.000433	0.538961
Ag65	8	0 5 6 7	simulteneous	0.00399	0.285495
Ag65	8	0 5 6 8	mixed	0.00099	0.539531
Ag65	8	0 5 6 8	simulteneous	0.008071	0.284632
Ag65	8	0 5 7	mixed	0.0008694	0.538448
Ag65	8	0 5 7	simulteneous	0.0067288	0.273026
Ag65	8	0 5 7 8	mixed	0.000867	0.537958
Ag65	8	0 5 7 8	simulteneous	0.006786	0.275997
Ag65	8	0 5 8	mixed	0.002272	0.538255
Ag65	8	0 5 8	simulteneous	0.0165494	0.2679
Ag65	8	0 6	mixed	0.0018364	0.528167
Ag65	8	0 6	simulteneous	0.013058	0.18154
Ag65	8	0 6 7	mixed	0.0007362	0.529555
Ag65	8	0 6 7	simulteneous	0.0055858	0.202554
Ag65	8	0 6 7 8	mixed	0.000724	0.529216
Ag65	8	0 6 7 8	simulteneous	0.005623	0.206274
Ag65	8	0 6 8	mixed	0.0018486	0.528807
Ag65	8	0 6 8	simulteneous	0.012954	0.195028
Ag65	8	0 7	mixed	0.0017088	0.522953
Ag65	8	0 7	simulteneous	0.0109078	0.119822
Ag65	8	0 7 8	mixed	0.0016748	0.523261
Ag65	8	0 7 8	simulteneous	0.0108684	0.135389
Ag65	8	0 8	mixed	0.0051066	0.520826
Ag65	8	0 8	simulteneous	0.0317808	0.0750582
Ag65	8	1 2	mixed	0.0041692	0.628197
Ag65	8	1 2	simulteneous	0.0314122	0.3098
Ag65	8	1 2 3	mixed	0.0030762	0.626125
Ag65	8	1 2 3	simulteneous	0.0269566	0.354258
Ag65	8	1 2 3 4	mixed	0.001912	0.624668
Ag65	8	1 2 3 4	simulteneous	0.018938	0.368591
Ag65	8	1 2 3 5	mixed	0.001505	0.626491
Ag65	8	1 2 3 5	simulteneous	0.014819	0.3737
Ag65	8	1 2 3 6	mixed	0.001219	0.625821
Ag65	8	1 2 3 6	simulteneous	0.011686	0.373514
Ag65	8	1 2 3 7	mixed	0.001166	0.625615
Ag65	8	1 2 3 7	simulteneous	0.009538	0.371495
Ag65	8	1 2 3 8	mixed	0.00303	0.626132
Ag65	8	1 2 3 8	simulteneous	0.027552	0.364636
Ag65	8	1 2 4	mixed	0.0024136	0.629483
Ag65	8	1 2 4	simulteneous	0.0213096	0.371521
Ag65	8	1 2 4 5	mixed	0.001367	0.627976
Ag65	8	1 2 4 5	simulteneous	0.012191	0.384883
Ag65	8	1 2 4 6	mixed	0.001114	0.628706
Ag65	8	1 2 4 6	simulteneous	0.009602	0.382475
Ag65	8	1 2 4 7	mixed	0.000903	0.630158
Ag65	8	1 2 4 7	simulteneous	0.008171	0.380434
Ag65	8	1 2 4 8	mixed	0.002525	0.629556
Ag65	8	1 2 4 8	simulteneous	0.02134	0.378677
Ag65	8	1 2 5	mixed	0.0019222	0.630617
Ag65	8	1 2 5	simulteneous	0.0164592	0.369657
Ag65	8	1 2 5 6	mixed	0.000918	0.629382
Ag65	8	1 2 5 6	simulteneous	0.007892	0.378482
Ag65	8	1 2 5 7	mixed	0.000807	0.630123
Ag65	8	1 2 5 7	simulteneous	0.006679	0.378034
Ag65	8	1 2 5 8	mixed	0.001867	0.63008
Ag65	8	1 2 5 8	simulteneous	0.015891	0.376391
Ag65	8	1 2 6	mixed	0.0015908	0.630102
Ag65	8	1 2 6	simulteneous	0.0128898	0.357547
Ag65	8	1 2 6 7	mixed	0.000631	0.630127
Ag65	8	1 2 6 7	simulteneous	0.005457	0.364834
Ag65	8	1 2 6 8	mixed	0.001681	0.629159
Ag65	8	1 2 6 8	simulteneous	0.012547	0.363183
Ag65	8	1 2 7	mixed	0.0014062	0.62886
Ag65	8	1 2 7	simulteneous	0.0108824	0.342729
Ag65	8	1 2 7 8	mixed	0.001461	0.630233
Ag65	8	1 2 7 8	simulteneous	0.010465	0.349537
Ag65	8	1 2 8	mixed	0.004181	0.6286
Ag65	8	1 2 8	simulteneous	0.0315872	0.330834
Ag65	8	1 3	mixed	0.00347	0.641616
Ag65	8	1 3	simulteneous	0.0269372	0.384091
Ag65	8	1 3 4	mixed	0.0021182	0.640845
Ag65	8	1 3 4	simulteneous	0.0187982	0.412459
Ag65	8	1 3 4 5	mixed	0.001127	0.639991
Ag65	8	1 3 4 5	simulteneous	0.011084	0.419545
Ag65	8	1 3 4 6	mixed	0.000968	0.639492
Ag65	8	1 3 4 6	simulteneous	0.009092	0.417679
Ag65	8	1 3 4 7	mixed	0.000845	0.639832
Ag65	8	1 3 4 7	simulteneous	0.007462	0.419922
Ag65	8	1 3 4 8	mixed	0.002114	0.640582
Ag65	8	1 3 4 8	simulteneous	0.019016	0.417477
Ag65	8	1 3 5	mixed	0.0016678	0.641761
Ag65	8	1 3 5	simulteneous	0.0147286	0.412872
Ag65	8	1 3 5 6	mixed	0.000768	0.641765
Ag65	8	1 3 5 6	simulteneous	0.007553	0.417028
Ag65	8	1 3 5 7	mixed	0.000662	0.64081
Ag65	8	1 3 5 7	simulteneous	0.00617	0.416633
Ag65	8	1 3 5 8	mixed	0.001649	0.641551
Ag65	8	1 3 5 8	simulteneous	0.014709	0.417413
Ag65	8	1 3 6	mixed	0.0013606	0.642132
Ag65	8	1 3 6	simulteneous	0.0116362	0.408478
Ag65	8	1 3 6 7	mixed	0.000613	0.639971
Ag65	8	1 3 6 7	simulteneous	0.005405	0.411493
Ag65	8	1 3 6 8	mixed	0.001439	0.640839
Ag65	8	1 3 6 8	simulteneous	0.011412	0.412388
Ag65	8	1 3 7	mixed	0.0012332	0.641782
Ag65	8	1 3 7	simulteneous	0.0096804	0.403556
Ag65	8	1 3 7 8	mixed	0.001186	0.640779
Ag65	8	1 3 7 8	simulteneous	0.009564	0.405534
Ag65	8	1 3 8	mixed	0.0034392	0.641988
Ag65	8	1 3 8	simulteneous	0.027124	0.396613
Ag65	8	1 4	mixed	0.0027706	0.643101
Ag65	8	1 4	simulteneous	0.0217378	0.390298
Ag65	8	1 4 5	mixed	0.0014332	0.641677
Ag65	8	1 4 5	simulteneous	0.0122834	0.412747
Ag65	8	1 4 5 6	mixed	0.000694	0.640428
Ag65	8	1 4 5 6	simulteneous	0.006566	0.415773
Ag65	8	1 4 5 7	mixed	0.000589	0.640939
Ag65	8	1 4 5 7	simulteneous	0.005595	0.416411
Ag65	8	1 4 5 8	mixed	0.001369	0.642052
Ag65	8	1 4 5 8	simulteneous	0.012301	0.416105
Ag65	8	1 4 6	mixed	0.0011444	0.642387
Ag65	8	1 4 6	simulteneous	0.009829	0.408021
Ag65	8	1 4 6 7	mixed	0.000553	0.64226
Ag65	8	1 4 6 7	simulteneous	0.004567	0.411149
Ag65	8	1 4 6 8	mixed	0.001173	0.642853
Ag65	8	1 4 6 8	simulteneous	0.009926	0.409131
Ag65	8	1 4 7	mixed	0.0010144	0.642322
Ag65	8	1 4 7	simulteneous	0.0081814	0.403713
Ag65	8	1 4 7 8	mixed	0.001094	0.64102
Ag65	8	1 4 7 8	simulteneous	0.008356	0.404866
Ag65	8	1 4 8	mixed	0.0027804	0.642255
Ag65	8	1 4 8	simulteneous	0.021308	0.401708
Ag65	8	1 5	mixed	0.0021748	0.639281
Ag65	8	1 5	simulteneous	0.0165658	0.356457
Ag65	8	1 5 6	mixed	0.0009742	0.638577
Ag65	8	1 5 6	simulteneous	0.0080362	0.374201
Ag65	8	1 5 6 7	mixed	0.000438	0.638926
Ag65	8	1 5 6 7	simulteneous	0.003941	0.378389
Ag65	8	1 5 6 8	mixed	0.00095	0.637805
Ag65	8	1 5 6 8	simulteneous	0.008241	0.375528
Ag65	8	1 5 7	mixed	0.0008506	0.638758
Ag65	8	1 5 7	simulteneous	0.006685	0.368614
Ag65	8	1 5 7 8	mixed	0.000877	0.637471
Ag65	8	1 5 7 8	simulteneous	0.006449	0.371267
Ag65	8	1 5 8	mixed	0.002215	0.63833
Ag65	8	1 5 8	simulteneous	0.0165454	0.364787
Ag65	8	1 6	mixed	0.0018118	0.63573
Ag65	8	1 6	simulteneous	0.0130184	0.304206
Ag65	8	1 6 7	mixed	0.0007472	0.63478
Ag65	8	1 6 7	simulteneous	0.0056598	0.318634
Ag65	8	1 6 7 8	mixed	0.000703	0.63499
Ag65	8	1 6 7 8	simulteneous	0.005558	0.32104
Ag65	8	1 6 8	mixed	0.0018086	0.635119
Ag65	8	1 6 8	simulteneous	0.0130744	0.313258
Ag65	8	1 7	mixed	0.0016338	0.634166
Ag65	8	1 7	simulteneous	0.010851	0.258766
Ag65	8	1 7 8	mixed	0.001625	0.633032
Ag65	8	1 7 8	simulteneous	0.0108306	0.270172
Ag65	8	1 8	mixed	0.004912	0.632378
Ag65	8	1 8	simulteneous	0.0320948	0.225076
Ag65	8	2 3	mixed	0.0031614	0.687753
Ag65	8	2 3	simulteneous	0.0267162	0.5397
Ag65	8	2 3 4	mixed	0.0019876	0.682097
Ag65	8	2 3 4	simulteneous	0.0187776	0.541073
Ag65	8	2 3 4 5	mixed	0.001049	0.680535
Ag65	8	2 3 4 5	simulteneous	0.011247	0.539849
Ag65	8	2 3 4 6	mixed	0.000894	0.68137
Ag65	8	2 3 4 6	simulteneous	0.009222	0.540961
Ag65	8	2 3 4 7	mixed	0.000811	0.682424
Ag65	8	2 3 4 7	simulteneous	0.00751	0.544354
Ag65	8	2 3 4 8	mixed	0.001998	0.681084
Ag65	8	2 3 4 8	simulteneous	0.018487	0.545518
Ag65	8	2 3 5	mixed	0.0015828	0.684664
Ag65	8	2 3 5	simulteneous	0.0147496	0.547506
Ag65	8	2 3 5 6	mixed	0.000755	0.682955
Ag65	8	2 3 5 6	simulteneous	0.007571	0.549184
Ag65	8	2 3 5 7	mixed	0.000641	0.682524
Ag65	8	2 3 5 7	simulteneous	0.005993	0.551566
Ag65	8	2 3 5 8	mixed	0.001609	0.683414
Ag65	8	2 3 5 8	simulteneous	0.01467	0.549617
Ag65	8	2 3 6	mixed	0.0012862	0.686287
Ag65	8	2 3 6	simulteneous	0.0116444	0.549431
Ag65	8	2 3 6 7	mixed	0.000633	0.684945
Ag65	8	2 3 6 7	simulteneous	0.004926	0.554291
Ag65	8	2 3 6 8	mixed	0.001295	0.685711
Ag65	8	2 3 6 8	simulteneous	0.011545	0.550619
Ag65	8	2 3 7	mixed	0.0011328	0.686314
Ag65	8	2 3 7	simulteneous	0.0096262	0.549262
Ag65	8	2 3 7 8	mixed	0.00115	0.686152
Ag65	8	2 3 7 8	simulteneous	0.009598	0.55008
Ag65	8	2 3 8	mixed	0.00319	0.686667
Ag65	8	2 3 8	simulteneous	0.026615	0.546534
Ag65	8	2 4	mixed	0.0025502	0.692872
Ag65	8	2 4	simulteneous	0.0211526	0.567114
Ag65	8	2 4 5	mixed	0.0013328	0.689133
Ag65	8	2 4 5	simulteneous	0.0122536	0.569993
Ag65	8	2 4 5 6	mixed	0.000663	0.688437
Ag65	8	2 4 5 6	simulteneous	0.006541	0.566886
Ag65	8	2 4 5 7	mixed	0.00052	0.688856
Ag65	8	2 4 5 7	simulteneous	0.005553	0.569112
Ag65	8	2 4 5 8	mixed	0.001361	0.688538
Ag65	8	2 4 5 8	simulteneous	0.012316	0.570153
Ag65	8	2 4 6	mixed	0.0010682	0.690613
Ag65	8	2 4 6	simulteneous	0.0097736	0.570852
Ag65	8	2 4 6 7	mixed	0.000478	0.688772
Ag65	8	2 4 6 7	simulteneous	0.004488	0.570541
Ag65	8	2 4 6 8	mixed	0.001043	0.690192
Ag65	8	2 4 6 8	simulteneous	0.009863	0.570375
Ag65	8	2 4 7	mixed	0.0009834	0.691437
Ag65	8	2 4 7	simulteneous	0.0080592	0.570963
Ag65	8	2 4 7 8	mixed	0.00097	0.690225
Ag65	8	2 4 7 8	simulteneous	0.008133	0.572437
Ag65	8	2 4 8	mixed	0.00257	0.691407
Ag65	8	2 4 8	simulteneous	0.0214034	0.569728
Ag65	8	2 5	mixed	0.002026	0.694471
Ag65	8	2 5	simulteneous	0.0161778	0.570637
Ag65	8	2 5 6	mixed	0.0009328	0.692133
Ag65	8	2 5 6	simulteneous	0.008065	0.572341
Ag65	8	2 5 6 7	mixed	0.000439	0.690702
Ag65	8	2 5 6 7	simulteneous	0.003806	0.572972
Ag65	8	2 5 6 8	mixed	0.000902	0.690707
Ag65	8	2 5 6 8	simulteneous	0.007932	0.572802
Ag65	8	2 5 7	mixed	0.0008154	0.692904
Ag65	8	2 5 7	simulteneous	0.0067022	0.571844
Ag65	8	2 5 7 8	mixed	0.000783	0.692552
Ag65	8	2 5 7 8	simulteneous	0.006859	0.571079
Ag65	8	2 5 8	mixed	0.0020018	0.693352
Ag65	8	2 5 8	simulteneous	0.0163802	0.572303
Ag65	8	2 6	mixed	0.0016478	0.695702
Ag65	8	2 6	simulteneous	0.012841	0.562066
Ag65	8	2 6 7	mixed	0.0006984	0.693794
Ag65	8	2 6 7	simulteneous	0.0055296	0.563463
Ag65	8	2 6 7 8	mixed	0.000673	0.69246
Ag65	8	2 6 7 8	simulteneous	0.005492	0.563596
Ag65	8	2 6 8	mixed	0.0016466	0.693819
Ag65	8	2 6 8	simulteneous	0.0129068	0.562704
Ag65	8	2 7	mixed	0.001474	0.696249
Ag65	8	2 7	simulteneous	0.0107684	0.551496
Ag65	8	2 7 8	mixed	0.001501	0.694364
Ag65	8	2 7 8	simulteneous	0.010854	0.552091
Ag65	8	2 8	mixed	0.0043822	0.696184
Ag65	8	2 8	simulteneous	0.0314816	0.542484
Ag65	8	3 4	mixed	0.0021956	0.701435
Ag65	8	3 4	simulteneous	0.0189522	0.657732
Ag65	8	3 4 5	mixed	0.0011618	0.696094
Ag65	8	3 4 5	simulteneous	0.011292	0.651277
Ag65	8	3 4 5 6	mixed	0.0006	0.693378
Ag65	8	3 4 5 6	simulteneous	0.005924	0.649537
Ag65	8	3 4 5 7	mixed	0.000544	0.695427
Ag65	8	3 4 5 7	simulteneous	0.004999	0.648653
Ag65	8	3 4 5 8	mixed	0.001193	0.696311
Ag65	8	3 4 5 8	simulteneous	0.011246	0.650864
Ag65	8	3 4 6	mixed	0.0009488	0.698614
Ag65	8	3 4 6	simulteneous	0.0090716	0.654614
Ag65	8	3 4 6 7	mixed	0.000489	0.697398
Ag65	8	3 4 6 7	simulteneous	0.004276	0.65277
Ag65	8	3 4 6 8	mixed	0.000969	0.696982
Ag65	8	3 4 6 8	simulteneous	0.008856	0.653187
Ag65	8	3 4 7	mixed	0.0008682	0.699138
Ag65	8	3 4 7	simulteneous	0.0074176	0.657016
Ag65	8	3 4 7 8	mixed	0.000874	0.696444
Ag65	8	3 4 7 8	simulteneous	0.00747	0.655886
Ag65	8	3 4 8	mixed	0.0022204	0.699357
Ag65	8	3 4 8	simulteneous	0.0188926	0.657728
Ag65	8	3 5	mixed	0.0017252	0.704505
Ag65	8	3 5	simulteneous	0.0145776	0.666798
Ag65	8	3 5 6	mixed	0.0008092	0.701184
Ag65	8	3 5 6	simulteneous	0.007451	0.66248
Ag65	8	3 5 6 7	mixed	0.000395	0.699233
Ag65	8	3 5 6 7	simulteneous	0.003697	0.658961
Ag65	8	3 5 6 8	mixed	0.000832	0.701245
Ag65	8	3 5 6 8	simulteneous	0.00752	0.660486
Ag65	8	3 5 7	mixed	0.0007272	0.702569
Ag65	8	3 5 7	simulteneous	0.0061836	0.663568
Ag65	8	3 5 7 8	mixed	0.000741	0.699759
Ag65	8	3 5 7 8	simulteneous	0.006172	0.662186
Ag65	8	3 5 8	mixed	0.0017546	0.703422
Ag65	8	3 5 8	simulteneous	0.014703	0.664243
Ag65	8	3 6	mixed	0.0014202	0.707188
Ag65	8	3 6	simulteneous	0.0115654	0.668422
Ag65	8	3 6 7	mixed	0.0006226	0.704928
Ag65	8	3 6 7	simulteneous	0.0051808	0.665528
Ag65	8	3 6 7 8	mixed	0.000639	0.7032
Ag65	8	3 6 7 8	simulteneous	0.00502	0.665161
Ag65	8	3 6 8	mixed	0.001416	0.706144
Ag65	8	3 6 8	simulteneous	0.0117484	0.665224
Ag65	8	3 7	mixed	0.001284	0.709769
Ag65	8	3 7	simulteneous	0.0095904	0.669397
Ag65	8	3 7 8	mixed	0.0012902	0.706767
Ag65	8	3 7 8	simulteneous	0.0096442	0.667477
Ag65	8	3 8	mixed	0.0036382	0.71106
Ag65	8	3 8	simulteneous	0.0271148	0.667796
Ag65	8	4 5	mixed	0.0014374	0.691525
Ag65	8	4 5	simulteneous	0.012268	0.69894
Ag65	8	4 5 6	mixed	0.0007208	0.685914
Ag65	8	4 5 6	simulteneous	0.0065306	0.691533
Ag65	8	4 5 6 7	mixed	0.000341	0.684434
Ag65	8	4 5 6 7	simulteneous	0.003386	0.687274
Ag65	8	4 5 6 8	mixed	0.0007	0.683592
Ag65	8	4 5 6 8	simulteneous	0.006518	0.688513
Ag65	8	4 5 7	mixed	0.0006214	0.688352
Ag65	8	4 5 7	simulteneous	0.0054668	0.69438
Ag65	8	4 5 7 8	mixed	0.000584	0.686822
Ag65	8	4 5 7 8	simulteneous	0.005365	0.691326
Ag65	8	4 5 8	mixed	0.0014636	0.689117
Ag65	8	4 5 8	simulteneous	0.0123658	0.695377
Ag65	8	4 6	mixed	0.0012318	0.695229
Ag65	8	4 6	simulteneous	0.0095848	0.702998
Ag65	8	4 6 7	mixed	0.0005556	0.691842
Ag65	8	4 6 7	simulteneous	0.0045874	0.696947
Ag65	8	4 6 7 8	mixed	0.000547	0.691037
Ag65	8	4 6 7 8	simulteneous	0.00456	0.695619
Ag65	8	4 6 8	mixed	0.0012242	0.692818
Ag65	8	4 6 8	simulteneous	0.0098272	0.698446
Ag65	8	4 7	mixed	0.0010696	0.697506
Ag65	8	4 7	simulteneous	0.0081164	0.7057
Ag65	8	4 7 8	mixed	0.0010628	0.695224
Ag65	8	4 7 8	simulteneous	0.0082446	0.700975
Ag65	8	4 8	mixed	0.0029312	0.700773
Ag65	8	4 8	simulteneous	0.0214426	0.708256
Ag65	8	5 6	mixed	0.0010256	0.669036
Ag65	8	5 6	simulteneous	0.0080092	0.691099
Ag65	8	5 6 7	mixed	0.0004552	0.662918
Ag65	8	5 6 7	simulteneous	0.0039582	0.684245
Ag65	8	5 6 7 8	mixed	0.000453	0.662815
Ag65	8	5 6 7 8	simulteneous	0.003941	0.681453
Ag65	8	5 6 8	mixed	0.001011	0.66447
Ag65	8	5 6 8	simulteneous	0.0079508	0.685562
Ag65	8	5 7	mixed	0.0008696	0.671918
Ag65	8	5 7	simulteneous	0.0067034	0.694677
Ag65	8	5 7 8	mixed	0.000892	0.669348
Ag65	8	5 7 8	simulteneous	0.0066876	0.689913
Ag65	8	5 8	mixed	0.0022548	0.675225
Ag65	8	5 8	simulteneous	0.016555	0.698107
Ag65	8	6 7	mixed	0.0007716	0.64558
Ag65	8	6 7	simulteneous	0.005511	0.667154
Ag65	8	6 7 8	mixed	0.0007714	0.64294
Ag65	8	6 7 8	simulteneous	0.0055372	0.661345
Ag65	8	6 8	mixed	0.0019154	0.650821
Ag65	8	6 8	simulteneous	0.0128514	0.670775
Ag65	8	7 8	mixed	0.0017558	0.626515
Ag65	8	7 8	simulteneous	0.0108404	0.650297
Ag65	9	0	mixed	0.0027214	0.517836
Ag65	9	0	simulteneous	0.0182088	0
Ag65	9	0 1	mixed	0.002685	0.521248
Ag65	9	0 1	simulteneous	0.018216	0.0851469
Ag65	9	0 1 2	mixed	0.002315	0.52853
Ag65	9	0 1 2	simulteneous	0.0181452	0.200424
Ag65	9	0 1 3	mixed	0.0020122	0.536966
Ag65	9	0 1 3	simulteneous	0.0163408	0.247324
Ag65	9	0 1 4	mixed	0.0016982	0.53605
Ag65	9	0 1 4	simulteneous	0.013825	0.246522
Ag65	9	0 1 5	mixed	0.0014084	0.531142
Ag65	9	0 1 5	simulteneous	0.011113	0.215535
Ag65	9	0 1 6	mixed	0.0011314	0.527048
Ag65	9	0 1 6	simulteneous	0.0089116	0.174601
Ag65	9	0 1 7	mixed	0.0009852	0.523954
Ag65	9	0 1 7	simulteneous	0.0072072	0.141801
Ag65	9	0 1 8	mixed	0.0009144	0.522195
Ag65	9	0 1 8	simulteneous	0.0063046	0.119962
Ag65	9	0 1 9	mixed	0.0026012	0.521624
Ag65	9	0 1 9	simulteneous	0.0181848	0.105599
Ag65	9	0 2	mixed	0.002475	0.55938
Ag65	9	0 2	simulteneous	0.01826	0.261691
Ag65	9	0 2 3	mixed	0.0018976	0.564108
Ag65	9	0 2 3	simulteneous	0.0162432	0.319238
Ag65	9	0 2 4	mixed	0.0015698	0.565212
Ag65	9	0 2 4	simulteneous	0.0136768	0.332089
Ag65	9	0 2 5	mixed	0.0012898	0.563996
Ag65	9	0 2 5	simulteneous	0.0109926	0.327543
Ag65	9	0 2 6	mixed	0.0010374	0.562714
Ag65	9	0 2 6	simulteneous	0.0088412	0.313084
Ag65	9	0 2 7	mixed	0.0009526	0.561069
Ag65	9	0 2 7	simulteneous	0.0072634	0.298092
Ag65	9	0 2 8	mixed	0.0008564	0.560174
Ag65	9	0 2 8	simulteneous	0.0062098	0.285589
Ag65	9	0 2 9	mixed	0.0024334	0.55932
Ag65	9	0 2 9	simulteneous	0.0181362	0.276994
Ag65	9	0 3	mixed	0.002077	0.562811
Ag65	9	0 3	simulteneous	0.016283	0.321907
Ag65	9	0 3 4	mixed	0.001428	0.565695
Ag65	9	0 3 4	simulteneous	0.0125394	0.359478
Ag65	9	0 3 5	mixed	0.001177	0.564261
Ag65	9	0 3 5	simulteneous	0.0102678	0.356768
Ag65	9	0 3 6	mixed	0.0009668	0.564166
Ag65	9	0 3 6	simulteneous	0.0080594	0.350806
Ag65	9	0 3 7	mixed	0.0008438	0.56259
Ag65	9	0 3 7	simulteneous	0.0066918	0.343794
Ag65	9	0 3 8	mixed	0.0007698	0.563157
Ag65	9	0 3 8	simulteneous	0.005849	0.337418
Ag65	9	0 3 9	mixed	0.0021454	0.562739
Ag65	9	0 3 9	simulteneous	0.0163564	0.331858
Ag65	9	0 4	mixed	0.001808	0.551803
Ag65	9	0 4	simulteneous	0.013492	0.314913
Ag65	9	0 4 5	mixed	0.0009922	0.553712
Ag65	9	0 4 5	simulteneous	0.008803	0.342866
Ag65	9	0 4 6	mixed	0.0008288	0.552759
Ag65	9	0 4 6	simulteneous	0.0071696	0.33527
Ag65	9	0 4 7	mixed	0.0007138	0.55249
Ag65	9	0 4 7	simulteneous	0.0058206	0.330444
Ag65	9	0 4 8	mixed	0.000658	0.551829
Ag65	9	0 4 8	simulteneous	0.0050864	0.326219
Ag65	9	0 4 9	mixed	0.001762	0.551925
Ag65	9	0 4 9	simulteneous	0.0138372	0.32225
Ag65	9	0 5	mixed	0.001407	0.537928
Ag65	9	0 5	simulteneous	0.010978	0.257299
Ag65	9	0 5 6	mixed	0.000677	0.538947
Ag65	9	0 5 6	simulteneous	0.0060866	0.280617
Ag65	9	0 5 7	mixed	0.0006096	0.537968
Ag65	9	0 5 7	simulteneous	0.0050126	0.27306
Ag65	9	0 5 8	mixed	0.0005506	0.537989
Ag65	9	0 5 8	simulteneous	0.0043044	0.268304
Ag65	9	0 5 9	mixed	0.0014226	0.537669
Ag65	9	0 5 9	simulteneous	0.0110556	0.264735
Ag65	9	0 6	mixed	0.001177	0.52939
Ag65	9	0 6	simulteneous	0.00903	0.182123
Ag65	9	0 6 7	mixed	0.000518	0.529091
Ag65	9	0 6 7	simulteneous	0.0042586	0.202495
Ag65	9	0 6 8	mixed	0.0004812	0.528953
Ag65	9	0 6 8	simulteneous	0.0035892	0.194845
Ag65	9	0 6 9	mixed	0.0011814	0.527882
Ag65	9	0 6 9	simulteneous	0.008914	0.190472
Ag65	9	0 7	mixed	0.001036	0.522949
Ag65	9	0 7	simulteneous	0.007402	0.120065
Ag65	9	0 7 8	mixed	0.0004188	0.523963
Ag65	9	0 7 8	simulteneous	0.003056	0.135673
Ag65	9	0 7 9	mixed	0.000997	0.523798
Ag65	9	0 7 9	simulteneous	0.0072722	0.129602
Ag65	9	0 8	mixed	0.0009	0.522923
Ag65	9	0 8	simulteneous	0.006254	0.0756291
Ag65	9	0 8 9	mixed	0.0009508	0.521358
Ag65	9	0 8 9	simulteneous	0.0063378	0.0867362
Ag65	9	0 9	mixed	0.002777	0.519758
Ag65	9	0 9	simulteneous	0.018443	0.0459178
Ag65	9	1	mixed	0.0026688	0.633367
Ag65	9	1	simulteneous	0.0183078	0.169835
Ag65	9	1 2	mixed	0.002362	0.628015
Ag65	9	1 2	simulteneous	0.01802	0.312388
Ag65	9	1 2 3	mixed	0.0018798	0.625961
Ag65	9	1 2 3	simulteneous	0.016399	0.355015
Ag65	9	1 2 4	mixed	0.0015664	0.629582
Ag65	9	1 2 4	simulteneous	0.0137872	0.371292
Ag65	9	1 2 5	mixed	0.0012424	0.630629
Ag65	9	1 2 5	simulteneous	0.011006	0.370551
Ag65	9	1 2 6	mixed	0.0010382	0.629434
Ag65	9	1 2 6	simulteneous	0.0087586	0.357537
Ag65	9	1 2 7	mixed	0.0009162	0.628807
Ag65	9	1 2 7	simulteneous	0.0072012	0.342798
Ag65	9	1 2 8	mixed	0.0008198	0.628406
Ag65	9	1 2 8	simulteneous	0.0062128	0.33155
Ag65	9	1 2 9	mixed	0.0023902	0.627884
Ag65	9	1 2 9	simulteneous	0.0183132	0.322099
Ag65	9	1 3	mixed	0.002111	0.640921
Ag65	9	1 3	simulteneous	0.016648	0.38318
Ag65	9	1 3 4	mixed	0.0014088	0.64085
Ag65	9	1 3 4	simulteneous	0.0127188	0.411836
Ag65	9	1 3 5	mixed	0.0011568	0.64109
Ag65	9	1 3 5	simulteneous	0.0103208	0.412505
Ag65	9	1 3 6	mixed	0.0009498	0.641528
Ag65	9	1 3 6	simulteneous	0.0081398	0.409086
Ag65	9	1 3 7	mixed	0.000787	0.642089
Ag65	9	1 3 7	simulteneous	0.0066784	0.403098
Ag65	9	1 3 8	mixed	0.0007534	0.640872
Ag65	9	1 3 8	simulteneous	0.005838	0.397348
Ag65	9	1 3 9	mixed	0.0020598	0.641527
Ag65	9	1 3 9	simulteneous	0.0164808	0.392754
Ag65	9	1 4	mixed	0.001787	0.642695
Ag65	9	1 4	simulteneous	0.014008	0.389741
Ag65	9	1 4 5	mixed	0.0009766	0.641863
Ag65	9	1 4 5	simulteneous	0.0088456	0.412485
Ag65	9	1 4 6	mixed	0.0008112	0.64226
Ag65	9	1 4 6	simulteneous	0.0072218	0.407904
Ag65	9	1 4 7	mixed	0.0007188	0.642515
Ag65	9	1 4 7	simulteneous	0.0057952	0.404397
Ag65	9	1 4 8	mixed	0.0006342	0.642492
Ag65	9	1 4 8	simulteneous	0.0051224	0.401162
Ag65	9	1 4 9	mixed	0.001689	0.643493
Ag65	9	1 4 9	simulteneous	0.01379	0.397995
Ag65	9	1 5	mixed	0.001454	0.639025
Ag65	9	1 5	simulteneous	0.011231	0.355303
Ag65	9	1 5 6	mixed	0.0006856	0.638031
Ag65	9	1 5 6	simulteneous	0.0060992	0.374025
Ag65	9	1 5 7	mixed	0.000601	0.638575
Ag65	9	1 5 7	simulteneous	0.004924	0.368648
Ag65	9	1 5 8	mixed	0.0005562	0.639284
Ag65	9	1 5 8	simulteneous	0.004359	0.364869
Ag65	9	1 5 9	mixed	0.0013622	0.63876
Ag65	9	1 5 9	simulteneous	0.0111198	0.362547
Ag65	9	1 6	mixed	0.001152	0.63494
Ag65	9	1 6	simulteneous	0.008929	0.303437
Ag65	9	1 6 7	mixed	0.0005176	0.635106
Ag65	9	1 6 7	simulteneous	0.0042412	0.31833
Ag65	9	1 6 8	mixed	0.0004656	0.635091
Ag65	9	1 6 8	simulteneous	0.0036802	0.31311
Ag65	9	1 6 9	mixed	0.0011478	0.635659
Ag65	9	1 6 9	simulteneous	0.0087048	0.310574
Ag65	9	1 7	mixed	0.001055	0.632713
Ag65	9	1 7	simulteneous	0.007181	0.259952
Ag65	9	1 7 8	mixed	0.0004224	0.632927
Ag65	9	1 7 8	simulteneous	0.0030598	0.270074
Ag65	9	1 7 9	mixed	0.0009674	0.633438
Ag65	9	1 7 9	simulteneous	0.0072178	0.265552
Ag65	9	1 8	mixed	0.000895	0.632473
Ag65	9	1 8	simulteneous	0.00625	0.225522
Ag65	9	1 8 9	mixed	0.0009164	0.633343
Ag65	9	1 8 9	simulteneous	0.0062846	0.233077
Ag65	9	1 9	mixed	0.002721	0.632338
Ag65	9	1 9	simulteneous	0.018394	0.20381
Ag65	9	2	mixed	0.0024498	0.697431
Ag65	9	2	simulteneous	0.0181154	0.528657
Ag65	9	2 3	mixed	0.001958	0.686237
Ag65	9	2 3	simulteneous	0.016091	0.540722
Ag65	9	2 3 4	mixed	0.001331	0.682363
Ag65	9	2 3 4	simulteneous	0.0125446	0.541625
Ag65	9	2 3 5	mixed	0.0010956	0.684801
Ag65	9	2 3 5	simulteneous	0.0101942	0.549383
Ag65	9	2 3 6	mixed	0.000909	0.685994
Ag65	9	2 3 6	simulteneous	0.008232	0.550322
Ag65	9	2 3 7	mixed	0.000785	0.685873
Ag65	9	2 3 7	simulteneous	0.0066626	0.549607
Ag65	9	2 3 8	mixed	0.0007012	0.686889
Ag65	9	2 3 8	simulteneous	0.0057892	0.546116
Ag65	9	2 3 9	mixed	0.001904	0.686636
Ag65	9	2 3 9	simulteneous	0.016484	0.543926
Ag65	9	2 4	mixed	0.001671	0.692134
Ag65	9	2 4	simulteneous	0.013754	0.566145
Ag65	9	2 4 5	mixed	0.0009738	0.689416
Ag65	9	2 4 5	simulteneous	0.0088728	0.569781
Ag65	9	2 4 6	mixed	0.0007794	0.690577
Ag65	9	2 4 6	simulteneous	0.0071502	0.570493
Ag65	9	2 4 7	mixed	0.0006606	0.691548
Ag65	9	2 4 7	simulteneous	0.0058814	0.570729
Ag65	9	2 4 8	mixed	0.0006246	0.691419
Ag65	9	2 4 8	simulteneous	0.0050358	0.570346
Ag65	9	2 4 9	mixed	0.0015562	0.692242
Ag65	9	2 4 9	simulteneous	0.0136504	0.569222
Ag65	9	2 5	mixed	0.001308	0.694642
Ag65	9	2 5	simulteneous	0.011092	0.570588
Ag65	9	2 5 6	mixed	0.000661	0.691873
Ag65	9	2 5 6	simulteneous	0.0061894	0.571247
Ag65	9	2 5 7	mixed	0.0005826	0.692363
Ag65	9	2 5 7	simulteneous	0.0049924	0.572407
Ag65	9	2 5 8	mixed	0.0004892	0.693072
Ag65	9	2 5 8	simulteneous	0.0043434	0.571201
Ag65	9	2 5 9	mixed	0.001305	0.693471
Ag65	9	2 5 9	simulteneous	0.0110376	0.57157
Ag65	9	2 6	mixed	0.001096	0.695426
Ag65	9	2 6	simulteneous	0.008911	0.561701
Ag65	9	2 6 7	mixed	0.0004724	0.693542
Ag65	9	2 6 7	simulteneous	0.0041772	0.56405
Ag65	9	2 6 8	mixed	0.0004514	0.694288
Ag65	9	2 6 8	simulteneous	0.0035914	0.56307
Ag65	9	2 6 9	mixed	0.0010918	0.694608
Ag65	9	2 6 9	simulteneous	0.0088912	0.561805
Ag65	9	2 7	mixed	0.000882	0.696146
Ag65	9	2 7	simulteneous	0.00724	0.550397
Ag65	9	2 7 8	mixed	0.000409	0.69416
Ag65	9	2 7 8	simulteneous	0.0030682	0.552539
Ag65	9	2 7 9	mixed	0.0009462	0.695185
Ag65	9	2 7 9	simulteneous	0.0071974	0.551767
Ag65	9	2 8	mixed	0.000907	0.695359
Ag65	9	2 8	simulteneous	0.00646	0.541804
Ag65	9	2 8 9	mixed	0.00087	0.694957
Ag65	9	2 8 9	simulteneous	0.0062422	0.543522
Ag65	9	2 9	mixed	0.00244	0.69693
Ag65	9	2 9	simulteneous	0.018714	0.533257
Ag65	9	3	mixed	0.0021454	0.713327
Ag65	9	3	simulteneous	0.0165582	0.669032
Ag65	9	3 4	mixed	0.001429	0.701255
Ag65	9	3 4	simulteneous	0.012595	0.659737
Ag65	9	3 4 5	mixed	0.0008756	0.696382
Ag65	9	3 4 5	simulteneous	0.0084144	0.650924
Ag65	9	3 4 6	mixed	0.000727	0.698867
Ag65	9	3 4 6	simulteneous	0.0067564	0.654273
Ag65	9	3 4 7	mixed	0.0006124	0.69911
Ag65	9	3 4 7	simulteneous	0.0056046	0.656641
Ag65	9	3 4 8	mixed	0.0005722	0.699627
Ag65	9	3 4 8	simulteneous	0.0048236	0.657451
Ag65	9	3 4 9	mixed	0.001432	0.700039
Ag65	9	3 4 9	simulteneous	0.0126486	0.657152
Ag65	9	3 5	mixed	0.001149	0.703518
Ag65	9	3 5	simulteneous	0.01024	0.666562
Ag65	9	3 5 6	mixed	0.0006082	0.701096
Ag65	9	3 5 6	simulteneous	0.0057256	0.662007
Ag65	9	3 5 7	mixed	0.0005084	0.702763
Ag65	9	3 5 7	simulteneous	0.0048092	0.662828
Ag65	9	3 5 8	mixed	0.0004836	0.703514
Ag65	9	3 5 8	simulteneous	0.0040976	0.664439
Ag65	9	3 5 9	mixed	0.001181	0.703255
Ag65	9	3 5 9	simulteneous	0.0102116	0.665115
Ag65	9	3 6	mixed	0.000914	0.706659
Ag65	9	3 6	simulteneous	0.008278	0.66789
Ag65	9	3 6 7	mixed	0.000452	0.704532
Ag65	9	3 6 7	simulteneous	0.0040364	0.664495
Ag65	9	3 6 8	mixed	0.0004086	0.705543
Ag65	9	3 6 8	simulteneous	0.0035258	0.666111
Ag65	9	3 6 9	mixed	0.00097	0.70653
Ag65	9	3 6 9	simulteneous	0.0080478	0.667491
Ag65	9	3 7	mixed	0.000826	0.710614
Ag65	9	3 7	simulteneous	0.00672	0.668875
Ag65	9	3 7 8	mixed	0.0003564	0.708206
Ag65	9	3 7 8	simulteneous	0.0029602	0.666913
Ag65	9	3 7 9	mixed	0.000815	0.70818
Ag65	9	3 7 9	simulteneous	0.0067256	0.66726
Ag65	9	3 8	mixed	0.000727	0.71045
Ag65	9	3 8	simulteneous	0.005882	0.66943
Ag65	9	3 8 9	mixed	0.0007916	0.709553
Ag65	9	3 8 9	simulteneous	0.0058576	0.666115
Ag65	9	3 9	mixed	0.002227	0.711268
Ag65	9	3 9	simulteneous	0.016369	0.668382
Ag65	9	4	mixed	0.0017524	0.704653
Ag65	9	4	simulteneous	0.0138426	0.713476
Ag65	9	4 5	mixed	0.000973	0.693427
Ag65	9	4 5	simulteneous	0.00885	0.699029
Ag65	9	4 5 6	mixed	0.000515	0.685591
Ag65	9	4 5 6	simulteneous	0.0050446	0.691643
Ag65	9	4 5 7	mixed	0.0004638	0.687762
Ag65	9	4 5 7	simulteneous	0.0042186	0.694139
Ag65	9	4 5 8	mixed	0.0004134	0.689048
Ag65	9	4 5 8	simulteneous	0.0036756	0.695315
Ag65	9	4 5 9	mixed	0.0010208	0.68886
Ag65	9	4 5 9	simulteneous	0.0088634	0.696803
Ag65	9	4 6	mixed	0.000827	0.697304
Ag65	9	4 6	simulteneous	0.007267	0.700928
Ag65	9	4 6 7	mixed	0.0004114	0.69072
Ag65	9	4 6 7	simulteneous	0.0035976	0.697081
Ag65	9	4 6 8	mixed	0.0003516	0.693046
Ag65	9	4 6 8	simulteneous	0.0031478	0.699
Ag65	9	4 6 9	mixed	0.0008332	0.694254
Ag65	9	4 6 9	simulteneous	0.0071702	0.69947
Ag65	9	4 7	mixed	0.000756	0.700308
Ag65	9	4 7	simulteneous	0.005814	0.704707
Ag65	9	4 7 8	mixed	0.0003288	0.695121
Ag65	9	4 7 8	simulteneous	0.0026532	0.701548
Ag65	9	4 7 9	mixed	0.0007054	0.69561
Ag65	9	4 7 9	simulteneous	0.0058696	0.702664
Ag65	9	4 8	mixed	0.000652	0.698514
Ag65	9	4 8	simulteneous	0.005286	0.707718
Ag65	9	4 8 9	mixed	0.0006528	0.698111
Ag65	9	4 8 9	simulteneous	0.0050968	0.704859
Ag65	9	4 9	mixed	0.001775	0.701026
Ag65	9	4 9	simulteneous	0.013676	0.70977
Ag65	9	5	mixed	0.001463	0.682809
Ag65	9	5	simulteneous	0.0110982	0.706627
Ag65	9	5 6	mixed	0.000686	0.67202
Ag65	9	5 6	simulteneous	0.005944	0.691053
Ag65	9	5 6 7	mixed	0.0003536	0.663329
Ag65	9	5 6 7	simulteneous	0.0031736	0.684054
Ag65	9	5 6 8	mixed	0.0003258	0.665647
Ag65	9	5 6 8	simulteneous	0.0027124	0.685934
Ag65	9	5 6 9	mixed	0.0007222	0.666645
Ag65	9	5 6 9	simulteneous	0.0061134	0.687431
Ag65	9	5 7	mixed	0.000663	0.674817
Ag65	9	5 7	simulteneous	0.004883	0.694638
Ag65	9	5 7 8	mixed	0.0002684	0.668788
Ag65	9	5 7 8	simulteneous	0.0023856	0.689649
Ag65	9	5 7 9	mixed	0.0006	0.669539
Ag65	9	5 7 9	simulteneous	0.0049388	0.690404
Ag65	9	5 8	mixed	0.000602	0.676151
Ag65	9	5 8	simulteneous	0.004185	0.69713
Ag65	9	5 8 9	mixed	0.0005714	0.672991
Ag65	9	5 8 9	simulteneous	0.0043238	0.692982
Ag65	9	5 9	mixed	0.00142	0.678578
Ag65	9	5 9	simulteneous	0.011148	0.700021
Ag65	9	6	mixed	0.0011972	0.659445
Ag65	9	6	simulteneous	0.0086932	0.683574
Ag65	9	6 7	mixed	0.000536	0.648366
Ag65	9	6 7	simulteneous	0.004099	0.668186
Ag65	9	6 7 8	mixed	0.0002612	0.639868
Ag65	9	6 7 8	simulteneous	0.002076	0.662555
Ag65	9	6 7 9	mixed	0.0005262	0.643718
Ag65	9	6 7 9	simulteneous	0.0042044	0.663365
Ag65	9	6 8	mixed	0.000477	0.653305
Ag65	9	6 8	simulteneous	0.003502	0.670012
Ag65	9	6 8 9	mixed	0.0004818	0.647666
Ag65	9	6 8 9	simulteneous	0.0036642	0.666997
Ag65	9	6 9	mixed	0.001164	0.654203
Ag65	9	6 9	simulteneous	0.008761	0.674049
Ag65	9	7	mixed	0.0010382	0.643241
Ag65	9	7	simulteneous	0.0071876	0.666933
Ag65	9	7 8	mixed	0.000409	0.626991
Ag65	9	7 8	simulteneous	0.003069	0.653704
Ag65	9	7 8 9	mixed	0.0004274	0.618973
Ag65	9	7 8 9	simulteneous	0.0030904	0.642103
Ag65	9	7 9	mixed	0.001061	0.629469
Ag65	9	7 9	simulteneous	0.007218	0.655916
Ag65	9	8	mixed	0.000974	0.627159
Ag65	9	8	simulteneous	0.0063068	0.65443
Ag65	9	8 9	mixed	0.000996	0.605906
Ag65	9	8 9	simulteneous	0.006304	0.640051
Ag65	9	9	mixed	0.002821	0.601052
Ag65	9	9	simulteneous	0.0185558	0.641832
Ag65	10	0	mixed	0.001534	0.518964
Ag65	10	0	simulteneous	0.010398	0
Ag65	10	0 1	mixed	0.001404	0.52181
Ag65	10	0 1	simulteneous	0.010483	0.0858818
Ag65	10	0 1 10	mixed	0.0014252	0.520916
Ag65	10	0 1 10	simulteneous	0.0104978	0.0971143
Ag65	10	0 1 2	mixed	0.0013138	0.528828
Ag65	10	0 1 2	simulteneous	0.0105494	0.200224
Ag65	10	0 1 2 10	mixed	0.0013476	0.52866
Ag65	10	0 1 2 10	simulteneous	0.0104254	0.207425
Ag65	10	0 1 2 3	mixed	0.0011062	0.53065
Ag65	10	0 1 2 3	simulteneous	0.009865	0.245599
Ag65	10	0 1 2 4	mixed	0.000973	0.532868
Ag65	10	0 1 2 4	simulteneous	0.0086078	0.25601
Ag65	10	0 1 2 5	mixed	0.0008264	0.53284
Ag65	10	0 1 2 5	simulteneous	0.0073016	0.252788
Ag65	10	0 1 2 6	mixed	0.0007024	0.531004
Ag65	10	0 1 2 6	simulteneous	0.0059036	0.242093
Ag65	10	0 1 2 7	mixed	0.0005728	0.529311
Ag65	10	0 1 2 7	simulteneous	0.0048922	0.228597
Ag65	10	0 1 2 8	mixed	0.0005022	0.529338
Ag65	10	0 1 2 8	simulteneous	0.0041032	0.218809
Ag65	10	0 1 2 9	mixed	0.0004972	0.52936
Ag65	10	0 1 2 9	simulteneous	0.0037146	0.211815
Ag65	10	0 1 3	mixed	0.0011774	0.536533
Ag65	10	0 1 3	simulteneous	0.0097874	0.247226
Ag65	10	0 1 3 10	mixed	0.0011808	0.537026
Ag65	10	0 1 3 10	simulteneous	0.0098524	0.252223
Ag65	10	0 1 3 4	mixed	0.0008806	0.539284
Ag65	10	0 1 3 4	simulteneous	0.0080572	0.27758
Ag65	10	0 1 3 5	mixed	0.0007458	0.539033
Ag65	10	0 1 3 5	simulteneous	0.006962	0.27579
Ag65	10	0 1 3 6	mixed	0.0006182	0.538638
Ag65	10	0 1 3 6	simulteneous	0.0057166	0.271359
Ag65	10	0 1 3 7	mixed	0.0005178	0.538299
Ag65	10	0 1 3 7	simulteneous	0.0046174	0.265841
Ag65	10	0 1 3 8	mixed	0.0004514	0.53752
Ag65	10	0 1 3 8	simulteneous	0.0039168	0.259873
Ag65	10	0 1 3 9	mixed	0.0004588	0.537517
Ag65	10	0 1 3 9	simulteneous	0.0035584	0.255351
Ag65	10	0 1 4	mixed	0.0010394	0.535838
Ag65	10	0 1 4	simulteneous	0.0086042	0.246015
Ag65	10	0 1 4 10	mixed	0.0010276	0.53585
Ag65	10	0 1 4 10	simulteneous	0.0086028	0.250458
Ag65	10	0 1 4 5	mixed	0.0006534	0.537595
Ag65	10	0 1 4 5	simulteneous	0.006058	0.268848
Ag65	10	0 1 4 6	mixed	0.0005482	0.538008
Ag65	10	0 1 4 6	simulteneous	0.005065	0.264202
Ag65	10	0 1 4 7	mixed	0.0004594	0.537444
Ag65	10	0 1 4 7	simulteneous	0.0041818	0.259191
Ag65	10	0 1 4 8	mixed	0.0004126	0.536955
Ag65	10	0 1 4 8	simulteneous	0.0035026	0.255912
Ag65	10	0 1 4 9	mixed	0.0003996	0.536753
Ag65	10	0 1 4 9	simulteneous	0.0031816	0.252801
Ag65	10	0 1 5	mixed	0.0008886	0.530433
Ag65	10	0 1 5	simulteneous	0.007226	0.215792
Ag65	10	0 1 5 10	mixed	0.000868	0.531517
Ag65	10	0 1 5 10	simulteneous	0.007127	0.2196
Ag65	10	0 1 5 6	mixed	0.0004524	0.532566
Ag65	10	0 1 5 6	simulteneous	0.0044114	0.232123
Ag65	10	0 1 5 7	mixed	0.0004174	0.531965
Ag65	10	0 1 5 7	simulteneous	0.0036574	0.227077
Ag65	10	0 1 5 8	mixed	0.0003628	0.532152
Ag65	10	0 1 5 8	simulteneous	0.0030854	0.224033
Ag65	10	0 1 5 9	mixed	0.0003408	0.531793
Ag65	10	0 1 5 9	simulteneous	0.0027896	0.221709
Ag65	10	0 1 6	mixed	0.000736	0.527421
Ag65	10	0 1 6	simulteneous	0.005881	0.17482
Ag65	10	0 1 6 10	mixed	0.000738	0.52723
Ag65	10	0 1 6 10	simulteneous	0.0059324	0.1783
Ag65	10	0 1 6 7	mixed	0.0003492	0.527702
Ag65	10	0 1 6 7	simulteneous	0.0031232	0.186477
Ag65	10	0 1 6 8	mixed	0.0003102	0.526867
Ag65	10	0 1 6 8	simulteneous	0.0026632	0.183093
Ag65	10	0 1 6 9	mixed	0.000296	0.526827
Ag65	10	0 1 6 9	simulteneous	0.002388	0.180306
Ag65	10	0 1 7	mixed	0.0006028	0.524649
Ag65	10	0 1 7	simulteneous	0.0048458	0.141994
Ag65	10	0 1 7 10	mixed	0.000621	0.523677
Ag65	10	0 1 7 10	simulteneous	0.004846	0.14542
Ag65	10	0 1 7 8	mixed	0.0002666	0.524324
Ag65	10	0 1 7 8	simulteneous	0.0022654	0.150628
Ag65	10	0 1 7 9	mixed	0.000252	0.524681
Ag65	10	0 1 7 9	simulteneous	0.0020216	0.14749
Ag65	10	0 1 8	mixed	0.0005662	0.522591
Ag65	10	0 1 8	simulteneous	0.0040334	0.119747
Ag65	10	0 1 8 10	mixed	0.0005354	0.522622
Ag65	10	0 1 8 10	simulteneous	0.0040962	0.123116
Ag65	10	0 1 8 9	mixed	0.0002348	0.521901
Ag65	10	0 1 8 9	simulteneous	0.0017822	0.125487
Ag65	10	0 1 9	mixed	0.0005696	0.521633
Ag65	10	0 1 9	simulteneous	0.0037256	0.105829
Ag65	10	0 1 9 10	mixed	0.000547	0.52266
Ag65	10	0 1 9 10	simulteneous	0.0036904	0.109162
Ag65	10	0 10	mixed	0.001528	0.518792
Ag65	10	0 10	simulteneous	0.010487	0.0273085
Ag65	10	0 2	mixed	0.0014	0.55965
Ag65	10	0 2	simulteneous	0.010401	0.263318
Ag65	10	0 2 10	mixed	0.0013668	0.559006
Ag65	10	0 2 10	simulteneous	0.010595	0.270726
Ag65	10	0 2 3	mixed	0.0011554	0.563685
Ag65	10	0 2 3	simulteneous	0.0098094	0.318623
Ag65	10	0 2 3 10	mixed	0.0011542	0.564089
Ag65	10	0 2 3 10	simulteneous	0.0099288	0.323177
Ag65	10	0 2 3 4	mixed	0.0008316	0.564764
Ag65	10	0 2 3 4	simulteneous	0.0081132	0.335887
Ag65	10	0 2 3 5	mixed	0.0007154	0.565098
Ag65	10	0 2 3 5	simulteneous	0.0068658	0.339362
Ag65	10	0 2 3 6	mixed	0.000592	0.564817
Ag65	10	0 2 3 6	simulteneous	0.0057066	0.338261
Ag65	10	0 2 3 7	mixed	0.000506	0.564922
Ag65	10	0 2 3 7	simulteneous	0.0046568	0.334804
Ag65	10	0 2 3 8	mixed	0.0004356	0.564364
Ag65	10	0 2 3 8	simulteneous	0.003882	0.330961
Ag65	10	0 2 3 9	mixed	0.0004228	0.56384
Ag65	10	0 2 3 9	simulteneous	0.0035552	0.326454
Ag65	10	0 2 4	mixed	0.000995	0.565021
Ag65	10	0 2 4	simulteneous	0.0085542	0.331974
Ag65	10	0 2 4 10	mixed	0.0009802	0.565279
Ag65	10	0 2 4 10	simulteneous	0.0085432	0.335727
Ag65	10	0 2 4 5	mixed	0.000626	0.565656
Ag65	10	0 2 4 5	simulteneous	0.0061456	0.345393
Ag65	10	0 2 4 6	mixed	0.0005198	0.565613
Ag65	10	0 2 4 6	simulteneous	0.0050102	0.344205
Ag65	10	0 2 4 7	mixed	0.000443	0.564906
Ag65	10	0 2 4 7	simulteneous	0.0041246	0.342677
Ag65	10	0 2 4 8	mixed	0.0003976	0.565654
Ag65	10	0 2 4 8	simulteneous	0.003494	0.340179
Ag65	10	0 2 4 9	mixed	0.0003764	0.564881
Ag65	10	0 2 4 9	simulteneous	0.0032354	0.337761
Ag65	10	0 2 5	mixed	0.000843	0.563726
Ag65	10	0 2 5	simulteneous	0.0072802	0.326479
Ag65	10	0 2 5 10	mixed	0.0008344	0.564411
Ag65	10	0 2 5 10	simulteneous	0.0072468	0.329996
Ag65	10	0 2 5 6	mixed	0.0004758	0.564163
Ag65	10	0 2 5 6	simulteneous	0.0044126	0.337306
Ag65	10	0 2 5 7	mixed	0.0004018	0.563517
Ag65	10	0 2 5 7	simulteneous	0.0035908	0.335232
Ag65	10	0 2 5 8	mixed	0.0003442	0.563844
Ag65	10	0 2 5 8	simulteneous	0.003106	0.33317
Ag65	10	0 2 5 9	mixed	0.0003502	0.563652
Ag65	10	0 2 5 9	simulteneous	0.002781	0.331785
Ag65	10	0 2 6	mixed	0.0007032	0.562552
Ag65	10	0 2 6	simulteneous	0.0059244	0.313544
Ag65	10	0 2 6 10	mixed	0.0007008	0.562263
Ag65	10	0 2 6 10	simulteneous	0.0059364	0.315843
Ag65	10	0 2 6 7	mixed	0.0003244	0.562967
Ag65	10	0 2 6 7	simulteneous	0.0031694	0.320366
Ag65	10	0 2 6 8	mixed	0.0003054	0.561986
Ag65	10	0 2 6 8	simulteneous	0.002619	0.318641
Ag65	10	0 2 6 9	mixed	0.0002924	0.562524
Ag65	10	0 2 6 9	simulteneous	0.0023764	0.316836
Ag65	10	0 2 7	mixed	0.0005784	0.561047
Ag65	10	0 2 7	simulteneous	0.0048248	0.297853
Ag65	10	0 2 7 10	mixed	0.0005814	0.560984
Ag65	10	0 2 7 10	simulteneous	0.004834	0.300463
Ag65	10	0 2 7 8	mixed	0.0002674	0.560907
Ag65	10	0 2 7 8	simulteneous	0.0022676	0.302856
Ag65	10	0 2 7 9	mixed	0.000255	0.560613
Ag65	10	0 2 7 9	simulteneous	0.002033	0.301202
Ag65	10	0 2 8	mixed	0.0005328	0.559951
Ag65	10	0 2 8	simulteneous	0.0041156	0.285229
Ag65	10	0 2 8 10	mixed	0.00053	0.559793
Ag65	10	0 2 8 10	simulteneous	0.0040996	0.287173
Ag65	10	0 2 8 9	mixed	0.000216	0.559739
Ag65	10	0 2 8 9	simulteneous	0.0017772	0.288534
Ag65	10	0 2 9	mixed	0.0005104	0.560081
Ag65	10	0 2 9	simulteneous	0.0037408	0.27571
Ag65	10	0 2 9 10	mixed	0.0005034	0.559404
Ag65	10	0 2 9 10	simulteneous	0.0037452	0.278341
Ag65	10	0 3	mixed	0.001263	0.56149
Ag65	10	0 3	simulteneous	0.009861	0.321588
Ag65	10	0 3 10	mixed	0.0012276	0.562997
Ag65	10	0 3 10	simulteneous	0.009875	0.327749
Ag65	10	0 3 4	mixed	0.0008948	0.565949
Ag65	10	0 3 4	simulteneous	0.0081052	0.359037
Ag65	10	0 3 4 10	mixed	0.0009006	0.56626
Ag65	10	0 3 4 10	simulteneous	0.0081708	0.362438
Ag65	10	0 3 4 5	mixed	0.0005842	0.565406
Ag65	10	0 3 4 5	simulteneous	0.0058582	0.367425
Ag65	10	0 3 4 6	mixed	0.0004908	0.565867
Ag65	10	0 3 4 6	simulteneous	0.0048866	0.367437
Ag65	10	0 3 4 7	mixed	0.0004196	0.566033
Ag65	10	0 3 4 7	simulteneous	0.0040146	0.367383
Ag65	10	0 3 4 8	mixed	0.0003568	0.566064
Ag65	10	0 3 4 8	simulteneous	0.0034596	0.365927
Ag65	10	0 3 4 9	mixed	0.0003652	0.56589
Ag65	10	0 3 4 9	simulteneous	0.0030264	0.36425
Ag65	10	0 3 5	mixed	0.000757	0.565127
Ag65	10	0 3 5	simulteneous	0.006852	0.356781
Ag65	10	0 3 5 10	mixed	0.0007696	0.564722
Ag65	10	0 3 5 10	simulteneous	0.0068702	0.35975
Ag65	10	0 3 5 6	mixed	0.0004392	0.565064
Ag65	10	0 3 5 6	simulteneous	0.0042858	0.363288
Ag65	10	0 3 5 7	mixed	0.000368	0.564783
Ag65	10	0 3 5 7	simulteneous	0.0035556	0.362421
Ag65	10	0 3 5 8	mixed	0.000331	0.56552
Ag65	10	0 3 5 8	simulteneous	0.0029706	0.361366
Ag65	10	0 3 5 9	mixed	0.000304	0.564837
Ag65	10	0 3 5 9	simulteneous	0.002712	0.360298
Ag65	10	0 3 6	mixed	0.0006366	0.563557
Ag65	10	0 3 6	simulteneous	0.0057288	0.350372
Ag65	10	0 3 6 10	mixed	0.0006488	0.564078
Ag65	10	0 3 6 10	simulteneous	0.0056776	0.352563
Ag65	10	0 3 6 7	mixed	0.000335	0.564037
Ag65	10	0 3 6 7	simulteneous	0.0029812	0.355527
Ag65	10	0 3 6 8	mixed	0.0002824	0.564067
Ag65	10	0 3 6 8	simulteneous	0.0025412	0.354581
Ag65	10	0 3 6 9	mixed	0.000283	0.564076
Ag65	10	0 3 6 9	simulteneous	0.0023202	0.353256
Ag65	10	0 3 7	mixed	0.0005042	0.563733
Ag65	10	0 3 7	simulteneous	0.0046182	0.343798
Ag65	10	0 3 7 10	mixed	0.0005398	0.563349
Ag65	10	0 3 7 10	simulteneous	0.0047106	0.345449
Ag65	10	0 3 7 8	mixed	0.000245	0.563233
Ag65	10	0 3 7 8	simulteneous	0.0022806	0.347221
Ag65	10	0 3 7 9	mixed	0.0002344	0.563447
Ag65	10	0 3 7 9	simulteneous	0.0020202	0.346126
Ag65	10	0 3 8	mixed	0.0004804	0.563168
Ag65	10	0 3 8	simulteneous	0.003952	0.337189
Ag65	10	0 3 8 10	mixed	0.0004936	0.56355
Ag65	10	0 3 8 10	simulteneous	0.0039014	0.339086
Ag65	10	0 3 8 9	mixed	0.0002144	0.562893
Ag65	10	0 3 8 9	simulteneous	0.0017196	0.339846
Ag65	10	0 3 9	mixed	0.0004536	0.562739
Ag65	10	0 3 9	simulteneous	0.0035932	0.331929
Ag65	10	0 3 9 10	mixed	0.0004644	0.562649
Ag65	10	0 3 9 10	simulteneous	0.0035914	0.333089
Ag65	10	0 4	mixed	0.001075	0.552337
Ag65	10	0 4	simulteneous	0.008513	0.313674
Ag65	10	0 4 10	mixed	0.0010832	0.551523
Ag65	10	0 4 10	simulteneous	0.0085804	0.319216
Ag65	10	0 4 5	mixed	0.0006752	0.553799
Ag65	10	0 4 5	simulteneous	0.0060936	0.342792
Ag65	10	0 4 5 10	mixed	0.0006858	0.554256
Ag65	10	0 4 5 10	simulteneous	0.0060972	0.345142
Ag65	10	0 4 5 6	mixed	0.0003966	0.553682
Ag65	10	0 4 5 6	simulteneous	0.0038478	0.347835
Ag65	10	0 4 5 7	mixed	0.0003356	0.553659
Ag65	10	0 4 5 7	simulteneous	0.0032444	0.347099
Ag65	10	0 4 5 8	mixed	0.0003036	0.553642
Ag65	10	0 4 5 8	simulteneous	0.0027126	0.34689
Ag65	10	0 4 5 9	mixed	0.000278	0.553401
Ag65	10	0 4 5 9	simulteneous	0.0024646	0.34622
Ag65	10	0 4 6	mixed	0.000566	0.552731
Ag65	10	0 4 6	simulteneous	0.005091	0.335637
Ag65	10	0 4 6 10	mixed	0.0005706	0.552472
Ag65	10	0 4 6 10	simulteneous	0.005089	0.337382
Ag65	10	0 4 6 7	mixed	0.000279	0.552907
Ag65	10	0 4 6 7	simulteneous	0.0027864	0.339742
Ag65	10	0 4 6 8	mixed	0.0002546	0.55256
Ag65	10	0 4 6 8	simulteneous	0.0023744	0.339154
Ag65	10	0 4 6 9	mixed	0.0002552	0.552867
Ag65	10	0 4 6 9	simulteneous	0.002138	0.337953
Ag65	10	0 4 7	mixed	0.0004702	0.552345
Ag65	10	0 4 7	simulteneous	0.004189	0.330323
Ag65	10	0 4 7 10	mixed	0.0004698	0.552621
Ag65	10	0 4 7 10	simulteneous	0.0041946	0.332034
Ag65	10	0 4 7 8	mixed	0.0002226	0.552914
Ag65	10	0 4 7 8	simulteneous	0.0020558	0.33294
Ag65	10	0 4 7 9	mixed	0.000212	0.552014
Ag65	10	0 4 7 9	simulteneous	0.001863	0.332625
Ag65	10	0 4 8	mixed	0.000417	0.552105
Ag65	10	0 4 8	simulteneous	0.0035566	0.325818
Ag65	10	0 4 8 10	mixed	0.0004134	0.551683
Ag65	10	0 4 8 10	simulteneous	0.003567	0.327597
Ag65	10	0 4 8 9	mixed	0.000199	0.551968
Ag65	10	0 4 8 9	simulteneous	0.0015426	0.328432
Ag65	10	0 4 9	mixed	0.0004356	0.5519
Ag65	10	0 4 9	simulteneous	0.003234	0.322953
Ag65	10	0 4 9 10	mixed	0.0004106	0.552139
Ag65	10	0 4 9 10	simulteneous	0.0031744	0.324249
Ag65	10	0 5	mixed	0.000878	0.537621
Ag65	10	0 5	simulteneous	0.007152	0.25744
Ag65	10	0 5 10	mixed	0.0008964	0.537294
Ag65	10	0 5 10	simulteneous	0.0072378	0.262217
Ag65	10	0 5 6	mixed	0.0004924	0.539061
Ag65	10	0 5 6	simulteneous	0.0043508	0.28085
Ag65	10	0 5 6 10	mixed	0.000497	0.5393
Ag65	10	0 5 6 10	simulteneous	0.0043526	0.283233
Ag65	10	0 5 6 7	mixed	0.0002558	0.538913
Ag65	10	0 5 6 7	simulteneous	0.0024596	0.285087
Ag65	10	0 5 6 8	mixed	0.0002332	0.539245
Ag65	10	0 5 6 8	simulteneous	0.0021136	0.284428
Ag65	10	0 5 6 9	mixed	0.000217	0.539082
Ag65	10	0 5 6 9	simulteneous	0.0019008	0.283585
Ag65	10	0 5 7	mixed	0.000426	0.537769
Ag65	10	0 5 7	simulteneous	0.003674	0.272933
Ag65	10	0 5 7 10	mixed	0.0004024	0.537971
Ag65	10	0 5 7 10	simulteneous	0.0036712	0.274789
Ag65	10	0 5 7 8	mixed	0.0001916	0.538548
Ag65	10	0 5 7 8	simulteneous	0.0018464	0.276255
Ag65	10	0 5 7 9	mixed	0.0001958	0.538142
Ag65	10	0 5 7 9	simulteneous	0.0016112	0.275586
Ag65	10	0 5 8	mixed	0.0003658	0.538028
Ag65	10	0 5 8	simulteneous	0.0031044	0.26798
Ag65	10	0 5 8 10	mixed	0.0003638	0.537721
Ag65	10	0 5 8 10	simulteneous	0.003085	0.269555
Ag65	10	0 5 8 9	mixed	0.000186	0.537444
Ag65	10	0 5 8 9	simulteneous	0.0014498	0.270582
Ag65	10	0 5 9	mixed	0.0003646	0.537177
Ag65	10	0 5 9	simulteneous	0.0027918	0.264753
Ag65	10	0 5 9 10	mixed	0.000352	0.537752
Ag65	10	0 5 9 10	simulteneous	0.0027584	0.266551
Ag65	10	0 6	mixed	0.00081	0.529132
Ag65	10	0 6	simulteneous	0.005937	0.181605
Ag65	10	0 6 10	mixed	0.0007472	0.52851
Ag65	10	0 6 10	simulteneous	0.0059872	0.188088
Ag65	10	0 6 7	mixed	0.0003574	0.529054
Ag65	10	0 6 7	simulteneous	0.0031406	0.202736
Ag65	10	0 6 7 10	mixed	0.0003594	0.529064
Ag65	10	0 6 7 10	simulteneous	0.003113	0.204715
Ag65	10	0 6 7 8	mixed	0.000179	0.528958
Ag65	10	0 6 7 8	simulteneous	0.0016408	0.20646
Ag65	10	0 6 7 9	mixed	0.0001706	0.528935
Ag65	10	0 6 7 9	simulteneous	0.00147	0.205363
Ag65	10	0 6 8	mixed	0.0003214	0.52841
Ag65	10	0 6 8	simulteneous	0.0026506	0.194951
Ag65	10	0 6 8 10	mixed	0.0003236	0.528259
Ag65	10	0 6 8 10	simulteneous	0.0026686	0.197358
Ag65	10	0 6 8 9	mixed	0.0001494	0.528355
Ag65	10	0 6 8 9	simulteneous	0.0012692	0.197679
Ag65	10	0 6 9	mixed	0.0003206	0.528728
Ag65	10	0 6 9	simulteneous	0.0023936	0.190651
Ag65	10	0 6 9 10	mixed	0.0003232	0.52804
Ag65	10	0 6 9 10	simulteneous	0.0023792	0.192651
Ag65	10	0 7	mixed	0.000628	0.524189
Ag65	10	0 7	simulteneous	0.004668	0.119686
Ag65	10	0 7 10	mixed	0.0006246	0.524313
Ag65	10	0 7 10	simulteneous	0.0048424	0.126062
Ag65	10	0 7 8	mixed	0.0002896	0.523815
Ag65	10	0 7 8	simulteneous	0.0022848	0.135584
Ag65	10	0 7 8 10	mixed	0.0002786	0.52386
Ag65	10	0 7 8 10	simulteneous	0.0022936	0.137993
Ag65	10	0 7 8 9	mixed	0.0001356	0.523681
Ag65	10	0 7 8 9	simulteneous	0.0011158	0.138781
Ag65	10	0 7 9	mixed	0.0002652	0.523948
Ag65	10	0 7 9	simulteneous	0.0020144	0.12958
Ag65	10	0 7 9 10	mixed	0.0002666	0.523474
Ag65	10	0 7 9 10	simulteneous	0.0020502	0.131837
Ag65	10	0 8	mixed	0.000611	0.52131
Ag65	10	0 8	simulteneous	0.004015	0.074647
Ag65	10	0 8 10	mixed	0.0005664	0.520672
Ag65	10	0 8 10	simulteneous	0.004141	0.0823149
Ag65	10	0 8 9	mixed	0.0002352	0.521114
Ag65	10	0 8 9	simulteneous	0.0017764	0.0863385
Ag65	10	0 8 9 10	mixed	0.0002668	0.520548
Ag65	10	0 8 9 10	simulteneous	0.0017758	0.0887127
Ag65	10	0 9	mixed	0.000551	0.5189
Ag65	10	0 9	simulteneous	0.003687	0.0462381
Ag65	10	0 9 10	mixed	0.0005402	0.520167
Ag65	10	0 9 10	simulteneous	0.0036666	0.0529817
Ag65	10	1	mixed	0.001457	0.631956
Ag65	10	1	simulteneous	0.01044	0.171483
Ag65	10	1 10	mixed	0.001391	0.634198
Ag65	10	1 10	simulteneous	0.010328	0.188628
Ag65	10	1 2	mixed	0.001362	0.628613
Ag65	10	1 2	simulteneous	0.010428	0.310671
Ag65	10	1 2 10	mixed	0.0013658	0.627976
Ag65	10	1 2 10	simulteneous	0.0104342	0.317977
Ag65	10	1 2 3	mixed	0.0011136	0.625971
Ag65	10	1 2 3	simulteneous	0.0098392	0.355291
Ag65	10	1 2 3 10	mixed	0.0011122	0.62544
Ag65	10	1 2 3 10	simulteneous	0.0098582	0.359624
Ag65	10	1 2 3 4	mixed	0.0008326	0.624261
Ag65	10	1 2 3 4	simulteneous	0.0080962	0.369635
Ag65	10	1 2 3 5	mixed	0.0007056	0.626029
Ag65	10	1 2 3 5	simulteneous	0.0068916	0.374501
Ag65	10	1 2 3 6	mixed	0.0006114	0.626386
Ag65	10	1 2 3 6	simulteneous	0.005621	0.373977
Ag65	10	1 2 3 7	mixed	0.000487	0.626192
Ag65	10	1 2 3 7	simulteneous	0.0046764	0.369997
Ag65	10	1 2 3 8	mixed	0.0004484	0.625948
Ag65	10	1 2 3 8	simulteneous	0.0038402	0.367241
Ag65	10	1 2 3 9	mixed	0.0004332	0.625813
Ag65	10	1 2 3 9	simulteneous	0.0035026	0.36275
Ag65	10	1 2 4	mixed	0.0009848	0.629795
Ag65	10	1 2 4	simulteneous	0.008677	0.370965
Ag65	10	1 2 4 10	mixed	0.0009586	0.630025
Ag65	10	1 2 4 10	simulteneous	0.0085948	0.374931
Ag65	10	1 2 4 5	mixed	0.0006074	0.629526
Ag65	10	1 2 4 5	simulteneous	0.0061228	0.383399
Ag65	10	1 2 4 6	mixed	0.0005374	0.629077
Ag65	10	1 2 4 6	simulteneous	0.0050494	0.38309
Ag65	10	1 2 4 7	mixed	0.000455	0.629724
Ag65	10	1 2 4 7	simulteneous	0.004128	0.381236
Ag65	10	1 2 4 8	mixed	0.0003972	0.629359
Ag65	10	1 2 4 8	simulteneous	0.003544	0.379296
Ag65	10	1 2 4 9	mixed	0.0003814	0.629364
Ag65	10	1 2 4 9	simulteneous	0.0031828	0.377215
Ag65	10	1 2 5	mixed	0.0008142	0.630629
Ag65	10	1 2 5	simulteneous	0.0071662	0.369764
Ag65	10	1 2 5 10	mixed	0.0008468	0.630031
Ag65	10	1 2 5 10	simulteneous	0.0072418	0.372595
Ag65	10	1 2 5 6	mixed	0.0004616	0.630142
Ag65	10	1 2 5 6	simulteneous	0.0044216	0.378501
Ag65	10	1 2 5 7	mixed	0.0004022	0.630038
Ag65	10	1 2 5 7	simulteneous	0.0036744	0.377335
Ag65	10	1 2 5 8	mixed	0.0003436	0.630064
Ag65	10	1 2 5 8	simulteneous	0.0030908	0.374962
Ag65	10	1 2 5 9	mixed	0.0003344	0.630022
Ag65	10	1 2 5 9	simulteneous	0.0028104	0.373599
Ag65	10	1 2 6	mixed	0.0006846	0.62991
Ag65	10	1 2 6	simulteneous	0.0059474	0.357475
Ag65	10	1 2 6 10	mixed	0.0006722	0.63009
Ag65	10	1 2 6 10	simulteneous	0.0059684	0.359251
Ag65	10	1 2 6 7	mixed	0.0003342	0.630037
Ag65	10	1 2 6 7	simulteneous	0.0031162	0.364589
Ag65	10	1 2 6 8	mixed	0.0003146	0.629517
Ag65	10	1 2 6 8	simulteneous	0.0026932	0.363112
Ag65	10	1 2 6 9	mixed	0.0002886	0.629663
Ag65	10	1 2 6 9	simulteneous	0.0023698	0.360896
Ag65	10	1 2 7	mixed	0.0005812	0.629426
Ag65	10	1 2 7	simulteneous	0.0048324	0.343325
Ag65	10	1 2 7 10	mixed	0.0005952	0.628394
Ag65	10	1 2 7 10	simulteneous	0.0048022	0.345331
Ag65	10	1 2 7 8	mixed	0.0002612	0.628836
Ag65	10	1 2 7 8	simulteneous	0.0023076	0.347471
Ag65	10	1 2 7 9	mixed	0.000239	0.628908
Ag65	10	1 2 7 9	simulteneous	0.0020188	0.345823
Ag65	10	1 2 8	mixed	0.0005228	0.628688
Ag65	10	1 2 8	simulteneous	0.004132	0.330911
Ag65	10	1 2 8 10	mixed	0.0005108	0.628247
Ag65	10	1 2 8 10	simulteneous	0.0041084	0.333094
Ag65	10	1 2 8 9	mixed	0.0002244	0.628577
Ag65	10	1 2 8 9	simulteneous	0.0017852	0.335111
Ag65	10	1 2 9	mixed	0.0004816	0.628622
Ag65	10	1 2 9	simulteneous	0.003739	0.322651
Ag65	10	1 2 9 10	mixed	0.0004998	0.628161
Ag65	10	1 2 9 10	simulteneous	0.0037202	0.324563
Ag65	10	1 3	mixed	0.001219	0.641221
Ag65	10	1 3	simulteneous	0.01002	0.383517
Ag65	10	1 3 10	mixed	0.0012368	0.641417
Ag65	10	1 3 10	simulteneous	0.009956	0.388459
Ag65	10	1 3 4	mixed	0.0008976	0.640676
Ag65	10	1 3 4	simulteneous	0.0080824	0.412223
Ag65	10	1 3 4 10	mixed	0.0008912	0.640301
Ag65	10	1 3 4 10	simulteneous	0.008123	0.414834
Ag65	10	1 3 4 5	mixed	0.0005734	0.639503
Ag65	10	1 3 4 5	simulteneous	0.0058114	0.418459
Ag65	10	1 3 4 6	mixed	0.0004886	0.640028
Ag65	10	1 3 4 6	simulteneous	0.0048642	0.419344
Ag65	10	1 3 4 7	mixed	0.0004264	0.639919
Ag65	10	1 3 4 7	simulteneous	0.0040918	0.418401
Ag65	10	1 3 4 8	mixed	0.0003758	0.640629
Ag65	10	1 3 4 8	simulteneous	0.0034156	0.417759
Ag65	10	1 3 4 9	mixed	0.0003504	0.640501
Ag65	10	1 3 4 9	simulteneous	0.0030662	0.416854
Ag65	10	1 3 5	mixed	0.000755	0.641644
Ag65	10	1 3 5	simulteneous	0.0068222	0.412986
Ag65	10	1 3 5 10	mixed	0.0007522	0.641443
Ag65	10	1 3 5 10	simulteneous	0.0068814	0.414791
Ag65	10	1 3 5 6	mixed	0.0004272	0.64099
Ag65	10	1 3 5 6	simulteneous	0.0042092	0.418018
Ag65	10	1 3 5 7	mixed	0.0003486	0.640816
Ag65	10	1 3 5 7	simulteneous	0.003501	0.4175
Ag65	10	1 3 5 8	mixed	0.0003158	0.641182
Ag65	10	1 3 5 8	simulteneous	0.0030218	0.416678
Ag65	10	1 3 5 9	mixed	0.000331	0.641846
Ag65	10	1 3 5 9	simulteneous	0.0026364	0.415962
Ag65	10	1 3 6	mixed	0.0006326	0.641504
Ag65	10	1 3 6	simulteneous	0.0056802	0.407746
Ag65	10	1 3 6 10	mixed	0.0006142	0.641358
Ag65	10	1 3 6 10	simulteneous	0.0057066	0.409716
Ag65	10	1 3 6 7	mixed	0.0003102	0.641261
Ag65	10	1 3 6 7	simulteneous	0.003009	0.412924
Ag65	10	1 3 6 8	mixed	0.0002744	0.641271
Ag65	10	1 3 6 8	simulteneous	0.0026204	0.411432
Ag65	10	1 3 6 9	mixed	0.0002728	0.641066
Ag65	10	1 3 6 9	simulteneous	0.0023794	0.410032
Ag65	10	1 3 7	mixed	0.0005374	0.642561
Ag65	10	1 3 7	simulteneous	0.0046788	0.402842
Ag65	10	1 3 7 10	mixed	0.0005344	0.641532
Ag65	10	1 3 7 10	simulteneous	0.0046726	0.404571
Ag65	10	1 3 7 8	mixed	0.0002504	0.641179
Ag65	10	1 3 7 8	simulteneous	0.002199	0.406415
Ag65	10	1 3 7 9	mixed	0.0002446	0.641611
Ag65	10	1 3 7 9	simulteneous	0.0019706	0.405481
Ag65	10	1 3 8	mixed	0.0004878	0.641387
Ag65	10	1 3 8	simulteneous	0.0039284	0.39808
Ag65	10	1 3 8 10	mixed	0.0004586	0.641653
Ag65	10	1 3 8 10	simulteneous	0.0038984	0.398468
Ag65	10	1 3 8 9	mixed	0.000211	0.641349
Ag65	10	1 3 8 9	simulteneous	0.0017366	0.399068
Ag65	10	1 3 9	mixed	0.0004422	0.641735
Ag65	10	1 3 9	simulteneous	0.0035806	0.392906
Ag65	10	1 3 9 10	mixed	0.000457	0.641077
Ag65	10	1 3 9 10	simulteneous	0.0035738	0.394059
Ag65	10	1 4	mixed	0.001004	0.643748
Ag65	10	1 4	simulteneous	0.008414	0.393393
Ag65	10	1 4 10	mixed	0.0010658	0.642967
Ag65	10	1 4 10	simulteneous	0.0086186	0.395201
Ag65	10	1 4 5	mixed	0.0006644	0.6417
Ag65	10	1 4 5	simulteneous	0.0060912	0.412996
Ag65	10	1 4 5 10	mixed	0.0006664	0.641615
Ag65	10	1 4 5 10	simulteneous	0.0060674	0.414183
Ag65	10	1 4 5 6	mixed	0.0003832	0.640896
Ag65	10	1 4 5 6	simulteneous	0.003834	0.415703
Ag65	10	1 4 5 7	mixed	0.0003302	0.641983
Ag65	10	1 4 5 7	simulteneous	0.003229	0.415623
Ag65	10	1 4 5 8	mixed	0.0002906	0.641721
Ag65	10	1 4 5 8	simulteneous	0.0026916	0.41585
Ag65	10	1 4 5 9	mixed	0.0002792	0.641833
Ag65	10	1 4 5 9	simulteneous	0.0024158	0.415796
Ag65	10	1 4 6	mixed	0.0005598	0.642178
Ag65	10	1 4 6	simulteneous	0.0050416	0.40789
Ag65	10	1 4 6 10	mixed	0.0005872	0.642234
Ag65	10	1 4 6 10	simulteneous	0.0050714	0.40908
Ag65	10	1 4 6 7	mixed	0.0002744	0.641684
Ag65	10	1 4 6 7	simulteneous	0.0027656	0.411497
Ag65	10	1 4 6 8	mixed	0.0002512	0.641543
Ag65	10	1 4 6 8	simulteneous	0.0023482	0.410839
Ag65	10	1 4 6 9	mixed	0.0002342	0.641613
Ag65	10	1 4 6 9	simulteneous	0.0021526	0.410035
Ag65	10	1 4 7	mixed	0.000491	0.64297
Ag65	10	1 4 7	simulteneous	0.0041476	0.404486
Ag65	10	1 4 7 10	mixed	0.0004874	0.641968
Ag65	10	1 4 7 10	simulteneous	0.0041504	0.405372
Ag65	10	1 4 7 8	mixed	0.000229	0.641491
Ag65	10	1 4 7 8	simulteneous	0.0020382	0.406319
Ag65	10	1 4 7 9	mixed	0.0002144	0.642215
Ag65	10	1 4 7 9	simulteneous	0.0018524	0.405528
Ag65	10	1 4 8	mixed	0.0004208	0.642382
Ag65	10	1 4 8	simulteneous	0.00353	0.401234
Ag65	10	1 4 8 10	mixed	0.0004352	0.64209
Ag65	10	1 4 8 10	simulteneous	0.0035334	0.401858
Ag65	10	1 4 8 9	mixed	0.000188	0.642268
Ag65	10	1 4 8 9	simulteneous	0.0016396	0.401662
Ag65	10	1 4 9	mixed	0.0004	0.642041
Ag65	10	1 4 9	simulteneous	0.0032148	0.397009
Ag65	10	1 4 9 10	mixed	0.0004008	0.64242
Ag65	10	1 4 9 10	simulteneous	0.0031704	0.399376
Ag65	10	1 5	mixed	0.000886	0.639373
Ag65	10	1 5	simulteneous	0.00717	0.357184
Ag65	10	1 5 10	mixed	0.0008736	0.638775
Ag65	10	1 5 10	simulteneous	0.0071958	0.361035
Ag65	10	1 5 6	mixed	0.0004868	0.637968
Ag65	10	1 5 6	simulteneous	0.004405	0.373935
Ag65	10	1 5 6 10	mixed	0.0004968	0.637763
Ag65	10	1 5 6 10	simulteneous	0.0043842	0.376035
Ag65	10	1 5 6 7	mixed	0.0002558	0.637907
Ag65	10	1 5 6 7	simulteneous	0.0024998	0.376419
Ag65	10	1 5 6 8	mixed	0.00023	0.637679
Ag65	10	1 5 6 8	simulteneous	0.0021192	0.376389
Ag65	10	1 5 6 9	mixed	0.0002226	0.638118
Ag65	10	1 5 6 9	simulteneous	0.001863	0.376006
Ag65	10	1 5 7	mixed	0.0004148	0.638597
Ag65	10	1 5 7	simulteneous	0.0036412	0.368637
Ag65	10	1 5 7 10	mixed	0.000404	0.638507
Ag65	10	1 5 7 10	simulteneous	0.0036084	0.369475
Ag65	10	1 5 7 8	mixed	0.000224	0.637922
Ag65	10	1 5 7 8	simulteneous	0.0018386	0.370721
Ag65	10	1 5 7 9	mixed	0.000197	0.637946
Ag65	10	1 5 7 9	simulteneous	0.0016314	0.369806
Ag65	10	1 5 8	mixed	0.0003814	0.638861
Ag65	10	1 5 8	simulteneous	0.0030774	0.365198
Ag65	10	1 5 8 10	mixed	0.0003614	0.638464
Ag65	10	1 5 8 10	simulteneous	0.0030852	0.366251
Ag65	10	1 5 8 9	mixed	0.000182	0.637996
Ag65	10	1 5 8 9	simulteneous	0.0014724	0.36553
Ag65	10	1 5 9	mixed	0.0003456	0.639098
Ag65	10	1 5 9	simulteneous	0.0028294	0.361951
Ag65	10	1 5 9 10	mixed	0.000352	0.638546
Ag65	10	1 5 9 10	simulteneous	0.0027658	0.363328
Ag65	10	1 6	mixed	0.000732	0.635443
Ag65	10	1 6	simulteneous	0.006057	0.303529
Ag65	10	1 6 10	mixed	0.0007636	0.635743
Ag65	10	1 6 10	simulteneous	0.005927	0.308647
Ag65	10	1 6 7	mixed	0.00036	0.634858
Ag65	10	1 6 7	simulteneous	0.0031278	0.319013
Ag65	10	1 6 7 10	mixed	0.0003572	0.635158
Ag65	10	1 6 7 10	simulteneous	0.0031946	0.319841
Ag65	10	1 6 7 8	mixed	0.0001856	0.634552
Ag65	10	1 6 7 8	simulteneous	0.0016672	0.320907
Ag65	10	1 6 7 9	mixed	0.000163	0.634782
Ag65	10	1 6 7 9	simulteneous	0.0014502	0.319956
Ag65	10	1 6 8	mixed	0.0003152	0.635333
Ag65	10	1 6 8	simulteneous	0.0026518	0.313361
Ag65	10	1 6 8 10	mixed	0.000316	0.635092
Ag65	10	1 6 8 10	simulteneous	0.0026874	0.314413
Ag65	10	1 6 8 9	mixed	0.0001578	0.634375
Ag65	10	1 6 8 9	simulteneous	0.0012632	0.314853
Ag65	10	1 6 9	mixed	0.00031	0.635595
Ag65	10	1 6 9	simulteneous	0.0023924	0.31011
Ag65	10	1 6 9 10	mixed	0.0003086	0.635395
Ag65	10	1 6 9 10	simulteneous	0.0023768	0.311653
Ag65	10	1 7	mixed	0.000578	0.634727
Ag65	10	1 7	simulteneous	0.00497	0.258325
Ag65	10	1 7 10	mixed	0.000628	0.633569
Ag65	10	1 7 10	simulteneous	0.004815	0.263431
Ag65	10	1 7 8	mixed	0.0002902	0.633018
Ag65	10	1 7 8	simulteneous	0.0023042	0.269614
Ag65	10	1 7 8 10	mixed	0.0002904	0.633243
Ag65	10	1 7 8 10	simulteneous	0.0023008	0.270794
Ag65	10	1 7 8 9	mixed	0.000133	0.633151
Ag65	10	1 7 8 9	simulteneous	0.0011246	0.272248
Ag65	10	1 7 9	mixed	0.0002624	0.6335
Ag65	10	1 7 9	simulteneous	0.0020628	0.265063
Ag65	10	1 7 9 10	mixed	0.0002548	0.633339
Ag65	10	1 7 9 10	simulteneous	0.0020676	0.267078
Ag65	10	1 8	mixed	0.00053	0.632223
Ag65	10	1 8	simulteneous	0.004064	0.226698
Ag65	10	1 8 10	mixed	0.0005512	0.632417
Ag65	10	1 8 10	simulteneous	0.0041196	0.23013
Ag65	10	1 8 9	mixed	0.00024	0.632117
Ag65	10	1 8 9	simulteneous	0.0018162	0.233382
Ag65	10	1 8 9 10	mixed	0.0002518	0.632262
Ag65	10	1 8 9 10	simulteneous	0.0017738	0.234751
Ag65	10	1 9	mixed	0.000532	0.631723
Ag65	10	1 9	simulteneous	0.003794	0.205377
Ag65	10	1 9 10	mixed	0.0005356	0.632334
Ag65	10	1 9 10	simulteneous	0.0036852	0.208968
Ag65	10	10	mixed	0.001488	0.589147
Ag65	10	10	simulteneous	0.010284	0.619337
Ag65	10	2	mixed	0.001464	0.697777
Ag65	10	2	simulteneous	0.010566	0.528648
Ag65	10	2 10	mixed	0.001324	0.697352
Ag65	10	2 10	simulteneous	0.010468	0.531795
Ag65	10	2 3	mixed	0.001125	0.687154
Ag65	10	2 3	simulteneous	0.009658	0.539948
Ag65	10	2 3 10	mixed	0.0011536	0.687015
Ag65	10	2 3 10	simulteneous	0.0098424	0.54077
Ag65	10	2 3 4	mixed	0.0008522	0.682353
Ag65	10	2 3 4	simulteneous	0.008153	0.540714
Ag65	10	2 3 4 10	mixed	0.0008586	0.681667
Ag65	10	2 3 4 10	simulteneous	0.0080814	0.542312
Ag65	10	2 3 4 5	mixed	0.0005456	0.680124
Ag65	10	2 3 4 5	simulteneous	0.0059052	0.540297
Ag65	10	2 3 4 6	mixed	0.0004758	0.680669
Ag65	10	2 3 4 6	simulteneous	0.004862	0.544606
Ag65	10	2 3 4 7	mixed	0.000407	0.681396
Ag65	10	2 3 4 7	simulteneous	0.0040232	0.545465
Ag65	10	2 3 4 8	mixed	0.0003698	0.681843
Ag65	10	2 3 4 8	simulteneous	0.003376	0.544856
Ag65	10	2 3 4 9	mixed	0.0003496	0.681443
Ag65	10	2 3 4 9	simulteneous	0.0030822	0.544003
Ag65	10	2 3 5	mixed	0.0007332	0.684599
Ag65	10	2 3 5	simulteneous	0.0068898	0.548461
Ag65	10	2 3 5 10	mixed	0.0007178	0.68389
Ag65	10	2 3 5 10	simulteneous	0.0069022	0.549704
Ag65	10	2 3 5 6	mixed	0.0004266	0.683364
Ag65	10	2 3 5 6	simulteneous	0.0041908	0.550047
Ag65	10	2 3 5 7	mixed	0.0003516	0.683644
Ag65	10	2 3 5 7	simulteneous	0.0035234	0.550127
Ag65	10	2 3 5 8	mixed	0.0003142	0.683861
Ag65	10	2 3 5 8	simulteneous	0.0030072	0.549724
Ag65	10	2 3 5 9	mixed	0.0002962	0.684121
Ag65	10	2 3 5 9	simulteneous	0.0027164	0.549143
Ag65	10	2 3 6	mixed	0.0006104	0.68525
Ag65	10	2 3 6	simulteneous	0.0057694	0.549269
Ag65	10	2 3 6 10	mixed	0.0006056	0.685521
Ag65	10	2 3 6 10	simulteneous	0.0056878	0.550999
Ag65	10	2 3 6 7	mixed	0.0002944	0.684608
Ag65	10	2 3 6 7	simulteneous	0.0029976	0.552042
Ag65	10	2 3 6 8	mixed	0.0002756	0.684918
Ag65	10	2 3 6 8	simulteneous	0.0025592	0.551409
Ag65	10	2 3 6 9	mixed	0.0002556	0.685294
Ag65	10	2 3 6 9	simulteneous	0.002336	0.551069
Ag65	10	2 3 7	mixed	0.0005216	0.68628
Ag65	10	2 3 7	simulteneous	0.0047138	0.549224
Ag65	10	2 3 7 10	mixed	0.0005126	0.685525
Ag65	10	2 3 7 10	simulteneous	0.004664	0.549637
Ag65	10	2 3 7 8	mixed	0.0002366	0.685675
Ag65	10	2 3 7 8	simulteneous	0.00217	0.550355
Ag65	10	2 3 7 9	mixed	0.0002206	0.685743
Ag65	10	2 3 7 9	simulteneous	0.0019964	0.549752
Ag65	10	2 3 8	mixed	0.0004554	0.68703
Ag65	10	2 3 8	simulteneous	0.0039306	0.54611
Ag65	10	2 3 8 10	mixed	0.0004672	0.686093
Ag65	10	2 3 8 10	simulteneous	0.0039014	0.547472
Ag65	10	2 3 8 9	mixed	0.0001952	0.686218
Ag65	10	2 3 8 9	simulteneous	0.0017174	0.546456
Ag65	10	2 3 9	mixed	0.0004232	0.686973
Ag65	10	2 3 9	simulteneous	0.0036046	0.542353
Ag65	10	2 3 9 10	mixed	0.0004362	0.686193
Ag65	10	2 3 9 10	simulteneous	0.0035226	0.544184
Ag65	10	2 4	mixed	0.001018	0.691686
Ag65	10	2 4	simulteneous	0.008459	0.56733
Ag65	10	2 4 10	mixed	0.0009878	0.692361
Ag65	10	2 4 10	simulteneous	0.0085742	0.567836
Ag65	10	2 4 5	mixed	0.0006292	0.689465
Ag65	10	2 4 5	simulteneous	0.0060462	0.569542
Ag65	10	2 4 5 10	mixed	0.00065	0.688999
Ag65	10	2 4 5 10	simulteneous	0.0060294	0.570347
Ag65	10	2 4 5 6	mixed	0.0003818	0.688133
Ag65	10	2 4 5 6	simulteneous	0.003844	0.568287
Ag65	10	2 4 5 7	mixed	0.0003326	0.688117
Ag65	10	2 4 5 7	simulteneous	0.003231	0.570292
Ag65	10	2 4 5 8	mixed	0.0002792	0.688467
Ag65	10	2 4 5 8	simulteneous	0.0026884	0.570828
Ag65	10	2 4 5 9	mixed	0.0002722	0.688574
Ag65	10	2 4 5 9	simulteneous	0.0024302	0.571032
Ag65	10	2 4 6	mixed	0.0005616	0.690657
Ag65	10	2 4 6	simulteneous	0.0050856	0.570903
Ag65	10	2 4 6 10	mixed	0.0005362	0.69072
Ag65	10	2 4 6 10	simulteneous	0.0050182	0.571062
Ag65	10	2 4 6 7	mixed	0.0002756	0.689742
Ag65	10	2 4 6 7	simulteneous	0.0027754	0.571279
Ag65	10	2 4 6 8	mixed	0.000246	0.689644
Ag65	10	2 4 6 8	simulteneous	0.002389	0.571589
Ag65	10	2 4 6 9	mixed	0.0002304	0.689761
Ag65	10	2 4 6 9	simulteneous	0.0021476	0.571788
Ag65	10	2 4 7	mixed	0.0004464	0.69135
Ag65	10	2 4 7	simulteneous	0.0041358	0.571765
Ag65	10	2 4 7 10	mixed	0.0004678	0.691005
Ag65	10	2 4 7 10	simulteneous	0.0041616	0.571247
Ag65	10	2 4 7 8	mixed	0.0002112	0.690415
Ag65	10	2 4 7 8	simulteneous	0.0020534	0.570728
Ag65	10	2 4 7 9	mixed	0.0001918	0.690444
Ag65	10	2 4 7 9	simulteneous	0.001824	0.570912
Ag65	10	2 4 8	mixed	0.000406	0.691879
Ag65	10	2 4 8	simulteneous	0.0035144	0.571366
Ag65	10	2 4 8 10	mixed	0.0004056	0.691637
Ag65	10	2 4 8 10	simulteneous	0.0035594	0.570667
Ag65	10	2 4 8 9	mixed	0.0001836	0.69103
Ag65	10	2 4 8 9	simulteneous	0.00161	0.570346
Ag65	10	2 4 9	mixed	0.000388	0.692591
Ag65	10	2 4 9	simulteneous	0.0032122	0.569211
Ag65	10	2 4 9 10	mixed	0.0003836	0.691392
Ag65	10	2 4 9 10	simulteneous	0.003228	0.568383
Ag65	10	2 5	mixed	0.000869	0.694341
Ag65	10	2 5	simulteneous	0.007092	0.570168
Ag65	10	2 5 10	mixed	0.0008424	0.693874
Ag65	10	2 5 10	simulteneous	0.0072762	0.570623
Ag65	10	2 5 6	mixed	0.0004722	0.691706
Ag65	10	2 5 6	simulteneous	0.0043948	0.572731
Ag65	10	2 5 6 10	mixed	0.0004818	0.691675
Ag65	10	2 5 6 10	simulteneous	0.0043864	0.572394
Ag65	10	2 5 6 7	mixed	0.0002492	0.691667
Ag65	10	2 5 6 7	simulteneous	0.0024768	0.572327
Ag65	10	2 5 6 8	mixed	0.0002196	0.691957
Ag65	10	2 5 6 8	simulteneous	0.0021448	0.57222
Ag65	10	2 5 6 9	mixed	0.0002086	0.691823
Ag65	10	2 5 6 9	simulteneous	0.0019104	0.572227
Ag65	10	2 5 7	mixed	0.0004144	0.693233
Ag65	10	2 5 7	simulteneous	0.0036594	0.572312
Ag65	10	2 5 7 10	mixed	0.000411	0.692191
Ag65	10	2 5 7 10	simulteneous	0.00363	0.572861
Ag65	10	2 5 7 8	mixed	0.0001974	0.692068
Ag65	10	2 5 7 8	simulteneous	0.0018534	0.572051
Ag65	10	2 5 7 9	mixed	0.0001792	0.692331
Ag65	10	2 5 7 9	simulteneous	0.0016498	0.571792
Ag65	10	2 5 8	mixed	0.0003434	0.693583
Ag65	10	2 5 8	simulteneous	0.0030862	0.571683
Ag65	10	2 5 8 10	mixed	0.0003524	0.693011
Ag65	10	2 5 8 10	simulteneous	0.0030778	0.570427
Ag65	10	2 5 8 9	mixed	0.0001714	0.693388
Ag65	10	2 5 8 9	simulteneous	0.0014264	0.572196
Ag65	10	2 5 9	mixed	0.000344	0.694061
Ag65	10	2 5 9	simulteneous	0.0027824	0.571858
Ag65	10	2 5 9 10	mixed	0.0003554	0.693535
Ag65	10	2 5 9 10	simulteneous	0.0027454	0.570732
Ag65	10	2 6	mixed	0.000752	0.695324
Ag65	10	2 6	simulteneous	0.006039	0.561279
Ag65	10	2 6 10	mixed	0.000677	0.694886
Ag65	10	2 6 10	simulteneous	0.0059444	0.56195
Ag65	10	2 6 7	mixed	0.000347	0.693803
Ag65	10	2 6 7	simulteneous	0.0031364	0.563544
Ag65	10	2 6 7 10	mixed	0.0003458	0.693611
Ag65	10	2 6 7 10	simulteneous	0.003114	0.563041
Ag65	10	2 6 7 8	mixed	0.000183	0.692843
Ag65	10	2 6 7 8	simulteneous	0.0016464	0.562837
Ag65	10	2 6 7 9	mixed	0.0001616	0.692766
Ag65	10	2 6 7 9	simulteneous	0.0015048	0.562905
Ag65	10	2 6 8	mixed	0.0003108	0.694263
Ag65	10	2 6 8	simulteneous	0.00265	0.562897
Ag65	10	2 6 8 10	mixed	0.0003216	0.693545
Ag65	10	2 6 8 10	simulteneous	0.0026482	0.562673
Ag65	10	2 6 8 9	mixed	0.0001548	0.693653
Ag65	10	2 6 8 9	simulteneous	0.001286	0.56222
Ag65	10	2 6 9	mixed	0.0002862	0.694404
Ag65	10	2 6 9	simulteneous	0.0024024	0.561834
Ag65	10	2 6 9 10	mixed	0.0003026	0.693999
Ag65	10	2 6 9 10	simulteneous	0.0023936	0.562025
Ag65	10	2 7	mixed	0.000597	0.695487
Ag65	10	2 7	simulteneous	0.004818	0.551184
Ag65	10	2 7 10	mixed	0.0006154	0.694924
Ag65	10	2 7 10	simulteneous	0.0048624	0.550901
Ag65	10	2 7 8	mixed	0.000251	0.694173
Ag65	10	2 7 8	simulteneous	0.0022642	0.551914
Ag65	10	2 7 8 10	mixed	0.000277	0.693785
Ag65	10	2 7 8 10	simulteneous	0.002284	0.552291
Ag65	10	2 7 8 9	mixed	0.000129	0.693769
Ag65	10	2 7 8 9	simulteneous	0.0011516	0.552149
Ag65	10	2 7 9	mixed	0.0002594	0.694435
Ag65	10	2 7 9	simulteneous	0.0020348	0.551697
Ag65	10	2 7 9 10	mixed	0.0002584	0.694363
Ag65	10	2 7 9 10	simulteneous	0.002029	0.551638
Ag65	10	2 8	mixed	0.000547	0.695398
Ag65	10	2 8	simulteneous	0.004074	0.543549
Ag65	10	2 8 10	mixed	0.0005368	0.695241
Ag65	10	2 8 10	simulteneous	0.0040302	0.544122
Ag65	10	2 8 9	mixed	0.0002222	0.695152
Ag65	10	2 8 9	simulteneous	0.0017836	0.543187
Ag65	10	2 8 9 10	mixed	0.0002404	0.694866
Ag65	10	2 8 9 10	simulteneous	0.0017736	0.54291
Ag65	10	2 9	mixed	0.000561	0.696673
Ag65	10	2 9	simulteneous	0.003735	0.537805
Ag65	10	2 9 10	mixed	0.0005176	0.695928
Ag65	10	2 9 10	simulteneous	0.003749	0.53678
Ag65	10	3	mixed	0.001292	0.713544
Ag65	10	3	simulteneous	0.009929	0.669017
Ag65	10	3 10	mixed	0.001268	0.711105
Ag65	10	3 10	simulteneous	0.010002	0.667894
Ag65	10	3 4	mixed	0.000913	0.701428
Ag65	10	3 4	simulteneous	0.008052	0.658887
Ag65	10	3 4 10	mixed	0.0009036	0.700291
Ag65	10	3 4 10	simulteneous	0.0080974	0.657703
Ag65	10	3 4 5	mixed	0.0005676	0.696129
Ag65	10	3 4 5	simulteneous	0.0058262	0.651611
Ag65	10	3 4 5 10	mixed	0.000614	0.69557
Ag65	10	3 4 5 10	simulteneous	0.0058238	0.650194
Ag65	10	3 4 5 6	mixed	0.0003548	0.694031
Ag65	10	3 4 5 6	simulteneous	0.0036862	0.647977
Ag65	10	3 4 5 7	mixed	0.0002884	0.695217
Ag65	10	3 4 5 7	simulteneous	0.0031556	0.649605
Ag65	10	3 4 5 8	mixed	0.000271	0.695419
Ag65	10	3 4 5 8	simulteneous	0.002679	0.650482
Ag65	10	3 4 5 9	mixed	0.000239	0.695299
Ag65	10	3 4 5 9	simulteneous	0.0023722	0.650759
Ag65	10	3 4 6	mixed	0.0005028	0.698123
Ag65	10	3 4 6	simulteneous	0.0048862	0.655148
Ag65	10	3 4 6 10	mixed	0.0004896	0.697747
Ag65	10	3 4 6 10	simulteneous	0.0048722	0.654753
Ag65	10	3 4 6 7	mixed	0.0002638	0.696781
Ag65	10	3 4 6 7	simulteneous	0.0026886	0.65272
Ag65	10	3 4 6 8	mixed	0.000213	0.697256
Ag65	10	3 4 6 8	simulteneous	0.0023024	0.653327
Ag65	10	3 4 6 9	mixed	0.0002182	0.697278
Ag65	10	3 4 6 9	simulteneous	0.0020618	0.65436
Ag65	10	3 4 7	mixed	0.0004192	0.699075
Ag65	10	3 4 7	simulteneous	0.004019	0.656559
Ag65	10	3 4 7 10	mixed	0.0004446	0.698911
Ag65	10	3 4 7 10	simulteneous	0.0040394	0.65599
Ag65	10	3 4 7 8	mixed	0.0002044	0.698343
Ag65	10	3 4 7 8	simulteneous	0.0020024	0.655444
Ag65	10	3 4 7 9	mixed	0.0001872	0.699048
Ag65	10	3 4 7 9	simulteneous	0.001778	0.655455
Ag65	10	3 4 8	mixed	0.000381	0.699802
Ag65	10	3 4 8	simulteneous	0.003405	0.657188
Ag65	10	3 4 8 10	mixed	0.0003904	0.699347
Ag65	10	3 4 8 10	simulteneous	0.003405	0.656456
Ag65	10	3 4 8 9	mixed	0.0001752	0.699371
Ag65	10	3 4 8 9	simulteneous	0.0015372	0.656924
Ag65	10	3 4 9	mixed	0.0003606	0.700792
Ag65	10	3 4 9	simulteneous	0.003089	0.657511
Ag65	10	3 4 9 10	mixed	0.0003552	0.699534
Ag65	10	3 4 9 10	simulteneous	0.0030286	0.656825
Ag65	10	3 5	mixed	0.0008	0.706352
Ag65	10	3 5	simulteneous	0.006694	0.667995
Ag65	10	3 5 10	mixed	0.000787	0.704297
Ag65	10	3 5 10	simulteneous	0.0068096	0.666021
Ag65	10	3 5 6	mixed	0.0004372	0.701361
Ag65	10	3 5 6	simulteneous	0.0042574	0.661657
Ag65	10	3 5 6 10	mixed	0.0004248	0.700182
Ag65	10	3 5 6 10	simulteneous	0.004294	0.660208
Ag65	10	3 5 6 7	mixed	0.0002476	0.698768
Ag65	10	3 5 6 7	simulteneous	0.0024262	0.65944
Ag65	10	3 5 6 8	mixed	0.0002016	0.699741
Ag65	10	3 5 6 8	simulteneous	0.0020592	0.659885
Ag65	10	3 5 6 9	mixed	0.0001822	0.699923
Ag65	10	3 5 6 9	simulteneous	0.0018708	0.660651
Ag65	10	3 5 7	mixed	0.0003598	0.702609
Ag65	10	3 5 7	simulteneous	0.003531	0.662507
Ag65	10	3 5 7 10	mixed	0.0003664	0.701705
Ag65	10	3 5 7 10	simulteneous	0.0035378	0.662232
Ag65	10	3 5 7 8	mixed	0.0001878	0.700771
Ag65	10	3 5 7 8	simulteneous	0.0017928	0.661379
Ag65	10	3 5 7 9	mixed	0.0001746	0.701501
Ag65	10	3 5 7 9	simulteneous	0.0016046	0.662221
Ag65	10	3 5 8	mixed	0.000321	0.703358
Ag65	10	3 5 8	simulteneous	0.0030232	0.664794
Ag65	10	3 5 8 10	mixed	0.0003306	0.702593
Ag65	10	3 5 8 10	simulteneous	0.0029982	0.663104
Ag65	10	3 5 8 9	mixed	0.0001564	0.702422
Ag65	10	3 5 8 9	simulteneous	0.0014048	0.662966
Ag65	10	3 5 9	mixed	0.000308	0.70376
Ag65	10	3 5 9	simulteneous	0.0026832	0.664726
Ag65	10	3 5 9 10	mixed	0.0003062	0.7035
Ag65	10	3 5 9 10	simulteneous	0.0027052	0.663382
Ag65	10	3 6	mixed	0.000642	0.708384
Ag65	10	3 6	simulteneous	0.005557	0.670397
Ag65	10	3 6 10	mixed	0.0006532	0.706478
Ag65	10	3 6 10	simulteneous	0.005724	0.666597
Ag65	10	3 6 7	mixed	0.000329	0.704366
Ag65	10	3 6 7	simulteneous	0.0030086	0.665114
Ag65	10	3 6 7 10	mixed	0.0003206	0.704745
Ag65	10	3 6 7 10	simulteneous	0.003068	0.663869
Ag65	10	3 6 7 8	mixed	0.000169	0.70438
Ag65	10	3 6 7 8	simulteneous	0.0015854	0.663308
Ag65	10	3 6 7 9	mixed	0.0001534	0.704599
Ag65	10	3 6 7 9	simulteneous	0.0014006	0.663966
Ag65	10	3 6 8	mixed	0.0002862	0.705737
Ag65	10	3 6 8	simulteneous	0.0025736	0.66662
Ag65	10	3 6 8 10	mixed	0.0002832	0.704675
Ag65	10	3 6 8 10	simulteneous	0.0025664	0.665323
Ag65	10	3 6 8 9	mixed	0.0001404	0.704975
Ag65	10	3 6 8 9	simulteneous	0.001257	0.664753
Ag65	10	3 6 9	mixed	0.0002734	0.705914
Ag65	10	3 6 9	simulteneous	0.0023092	0.666331
Ag65	10	3 6 9 10	mixed	0.000274	0.706305
Ag65	10	3 6 9 10	simulteneous	0.0022832	0.66547
Ag65	10	3 7	mixed	0.000558	0.708495
Ag65	10	3 7	simulteneous	0.004668	0.667896
Ag65	10	3 7 10	mixed	0.0005424	0.708849
Ag65	10	3 7 10	simulteneous	0.0046782	0.667058
Ag65	10	3 7 8	mixed	0.0002576	0.707241
Ag65	10	3 7 8	simulteneous	0.0022088	0.666232
Ag65	10	3 7 8 10	mixed	0.0002602	0.707078
Ag65	10	3 7 8 10	simulteneous	0.0022484	0.66488
Ag65	10	3 7 8 9	mixed	0.0001178	0.706836
Ag65	10	3 7 8 9	simulteneous	0.001108	0.66508
Ag65	10	3 7 9	mixed	0.000247	0.707462
Ag65	10	3 7 9	simulteneous	0.0019592	0.666639
Ag65	10	3 7 9 10	mixed	0.0002518	0.707348
Ag65	10	3 7 9 10	simulteneous	0.0019794	0.665859
Ag65	10	3 8	mixed	0.000473	0.710355
Ag65	10	3 8	simulteneous	0.003976	0.667709
Ag65	10	3 8 10	mixed	0.0004758	0.70922
Ag65	10	3 8 10	simulteneous	0.0039398	0.666638
Ag65	10	3 8 9	mixed	0.000228	0.709059
Ag65	10	3 8 9	simulteneous	0.0017316	0.665737
Ag65	10	3 8 9 10	mixed	0.0002202	0.708341
Ag65	10	3 8 9 10	simulteneous	0.0017468	0.664969
Ag65	10	3 9	mixed	0.000476	0.711854
Ag65	10	3 9	simulteneous	0.003512	0.668957
Ag65	10	3 9 10	mixed	0.0004784	0.710004
Ag65	10	3 9 10	simulteneous	0.0035184	0.666855
Ag65	10	4	mixed	0.000972	0.70616
Ag65	10	4	simulteneous	0.008644	0.71329
Ag65	10	4 10	mixed	0.001075	0.702029
Ag65	10	4 10	simulteneous	0.008701	0.711311
Ag65	10	4 5	mixed	0.000671	0.692771
Ag65	10	4 5	simulteneous	0.006126	0.698258
Ag65	10	4 5 10	mixed	0.0006978	0.690303
Ag65	10	4 5 10	simulteneous	0.0060754	0.69723
Ag65	10	4 5 6	mixed	0.0004002	0.686221
Ag65	10	4 5 6	simulteneous	0.0038398	0.691555
Ag65	10	4 5 6 10	mixed	0.0003986	0.684948
Ag65	10	4 5 6 10	simulteneous	0.003822	0.690496
Ag65	10	4 5 6 7	mixed	0.0002122	0.684904
Ag65	10	4 5 6 7	simulteneous	0.0022194	0.688461
Ag65	10	4 5 6 8	mixed	0.0001996	0.684964
Ag65	10	4 5 6 8	simulteneous	0.0019268	0.689073
Ag65	10	4 5 6 9	mixed	0.000181	0.685177
Ag65	10	4 5 6 9	simulteneous	0.001729	0.689931
Ag65	10	4 5 7	mixed	0.000328	0.687627
Ag65	10	4 5 7	simulteneous	0.0031844	0.694782
Ag65	10	4 5 7 10	mixed	0.0003272	0.686957
Ag65	10	4 5 7 10	simulteneous	0.0032298	0.692326
Ag65	10	4 5 7 8	mixed	0.0001792	0.686418
Ag65	10	4 5 7 8	simulteneous	0.0016758	0.691541
Ag65	10	4 5 7 9	mixed	0.000151	0.687641
Ag65	10	4 5 7 9	simulteneous	0.001467	0.692459
Ag65	10	4 5 8	mixed	0.0003066	0.688337
Ag65	10	4 5 8	simulteneous	0.0027016	0.695545
Ag65	10	4 5 8 10	mixed	0.0002938	0.687837
Ag65	10	4 5 8 10	simulteneous	0.0027506	0.694526
Ag65	10	4 5 8 9	mixed	0.0001442	0.68807
Ag65	10	4 5 8 9	simulteneous	0.0013106	0.693816
Ag65	10	4 5 9	mixed	0.000288	0.690201
Ag65	10	4 5 9	simulteneous	0.0024538	0.696432
Ag65	10	4 5 9 10	mixed	0.0002804	0.689739
Ag65	10	4 5 9 10	simulteneous	0.0024496	0.694875
Ag65	10	4 6	mixed	0.000555	0.694703
Ag65	10	4 6	simulteneous	0.005018	0.703594
Ag65	10	4 6 10	mixed	0.0005818	0.693938
Ag65	10	4 6 10	simulteneous	0.0050234	0.700459
Ag65	10	4 6 7	mixed	0.0002912	0.691682
Ag65	10	4 6 7	simulteneous	0.0028324	0.69681
Ag65	10	4 6 7 10	mixed	0.0003066	0.690243
Ag65	10	4 6 7 10	simulteneous	0.0027686	0.695681
Ag65	10	4 6 7 8	mixed	0.0001488	0.690027
Ag65	10	4 6 7 8	simulteneous	0.0014894	0.694536
Ag65	10	4 6 7 9	mixed	0.0001428	0.690477
Ag65	10	4 6 7 9	simulteneous	0.0013274	0.69479
Ag65	10	4 6 8	mixed	0.0002426	0.691858
Ag65	10	4 6 8	simulteneous	0.0023856	0.698901
Ag65	10	4 6 8 10	mixed	0.000266	0.691309
Ag65	10	4 6 8 10	simulteneous	0.002392	0.69729
Ag65	10	4 6 8 9	mixed	0.0001388	0.692639
Ag65	10	4 6 8 9	simulteneous	0.001167	0.696348
Ag65	10	4 6 9	mixed	0.0002502	0.694338
Ag65	10	4 6 9	simulteneous	0.0021208	0.699645
Ag65	10	4 6 9 10	mixed	0.0002546	0.692024
Ag65	10	4 6 9 10	simulteneous	0.0021318	0.698348
Ag65	10	4 7	mixed	0.000529	0.698155
Ag65	10	4 7	simulteneous	0.004098	0.70596
Ag65	10	4 7 10	mixed	0.0004894	0.697062
Ag65	10	4 7 10	simulteneous	0.0042218	0.703062
Ag65	10	4 7 8	mixed	0.000237	0.695719
Ag65	10	4 7 8	simulteneous	0.0020588	0.701447
Ag65	10	4 7 8 10	mixed	0.0002186	0.696147
Ag65	10	4 7 8 10	simulteneous	0.0020224	0.700153
Ag65	10	4 7 8 9	mixed	0.000111	0.694233
Ag65	10	4 7 8 9	simulteneous	0.0010634	0.69931
Ag65	10	4 7 9	mixed	0.0002194	0.696544
Ag65	10	4 7 9	simulteneous	0.0018394	0.702494
Ag65	10	4 7 9 10	mixed	0.0002184	0.695013
[truncated: 9,836 more rows]
